# Supplementary material
Source: PubMed Central journal article supplement (PMC3136251)
Supplement: 1102600108_sapp.pdf [file 1102600108_sapp.pdf]

Supporting Figures

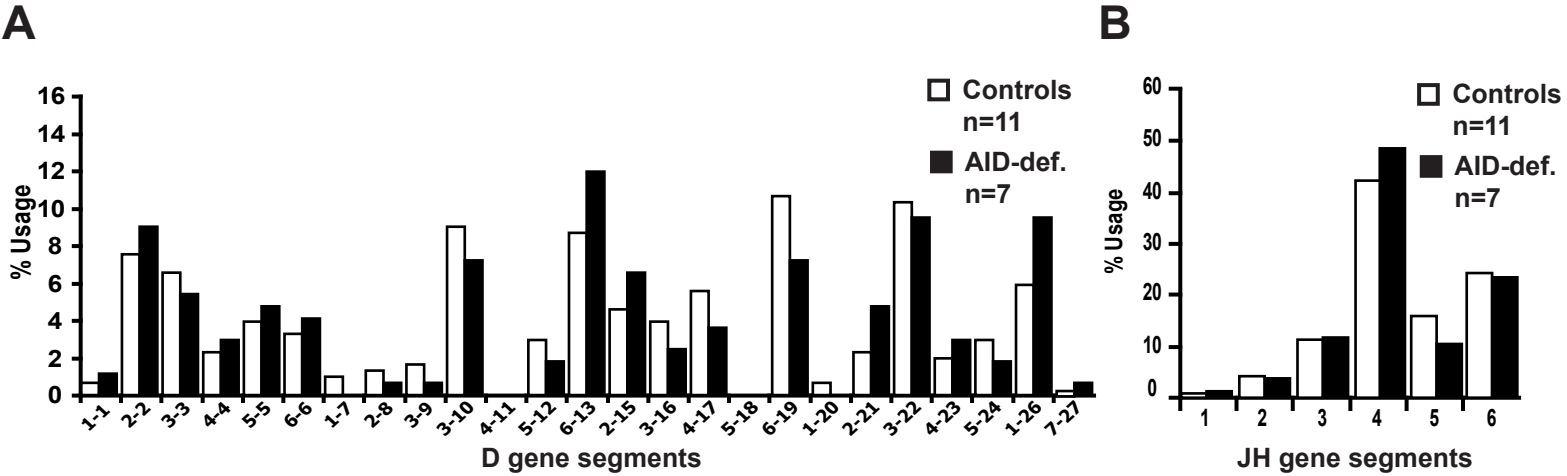

**Fig. S1.** D and JH gene segment usage for AID-deficient and healthy donor transitional B cells. **(A)** D gene usage frequencies in new emigrant/transitional B cells are represented for 11 healthy controls and 7 AID-deficient patients. Sequences from 353 healthy control and 189 AID-deficient single B cells were pooled. JH gene frequencies are represented in **(B)**.

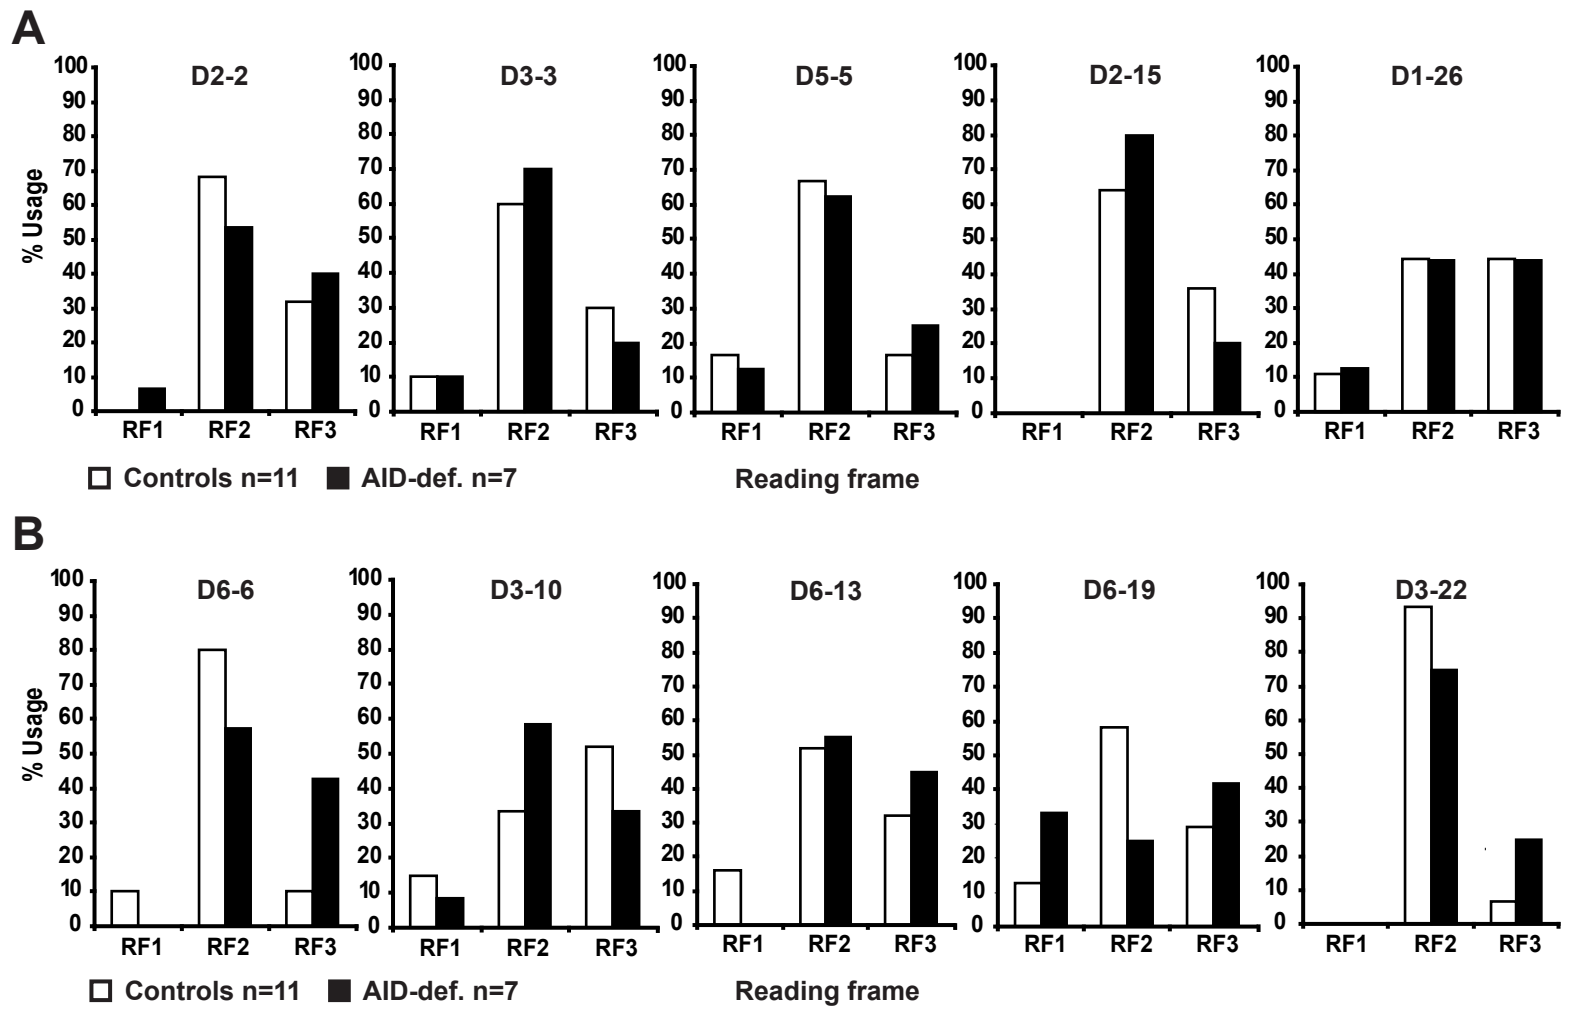

**Fig. S2.** Reading frame (RF) usages for frequently-used D genes are compared between new emigrant/transitional B cells from 11 healthy controls (open rectangles) and 7 AID-deficient patients (solid rectangles). **(A)** Half of the most-used D1, D2, D3 and D5 genes utilize similar reading frames in controls and patients. **(B)** In contrast, D6 and some D3 family members mostly utilize RF3 encoding hydrophobic residues favoring autoreactivity.

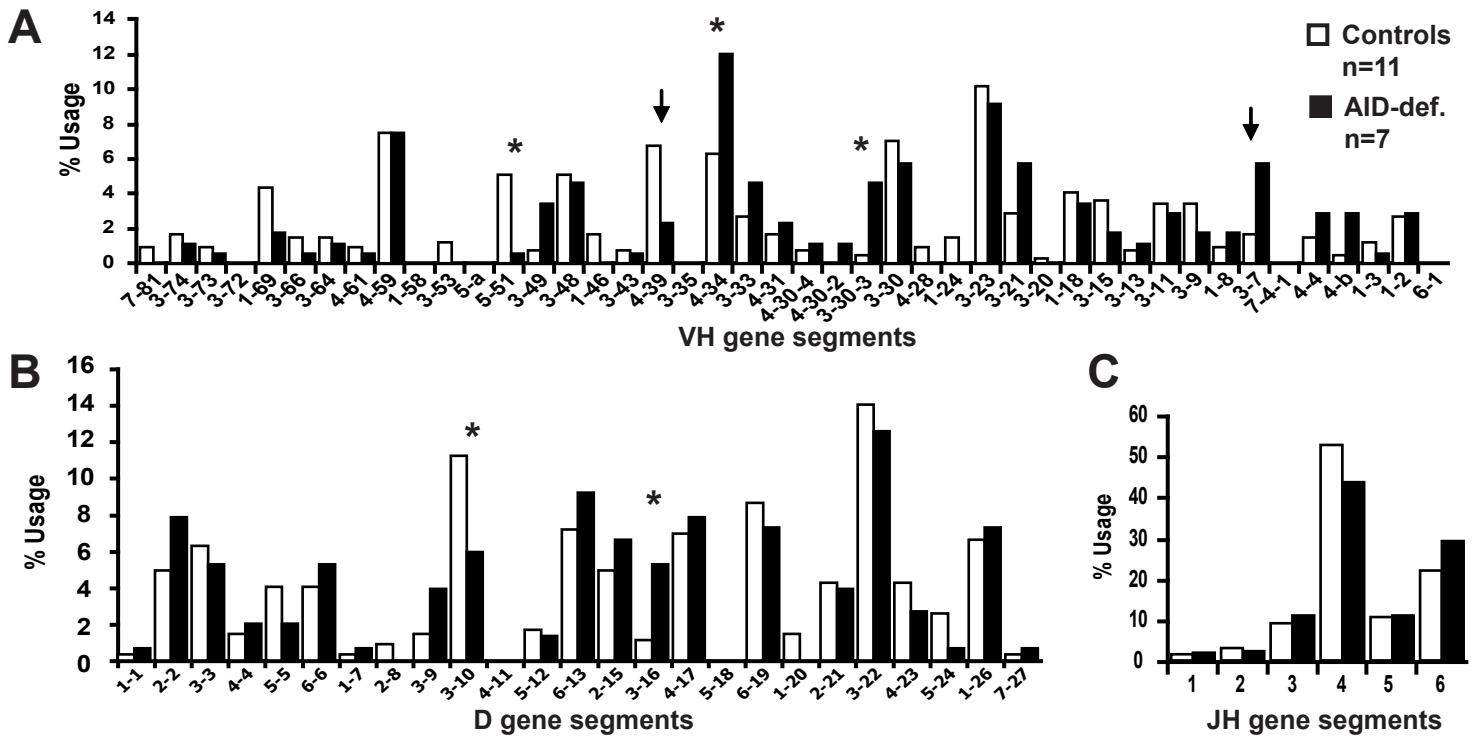

**Fig. S3.** VH, D and JH gene segment usage for AID-deficient and healthy donor mature naïve B cells. **(A)** V heavy chain gene usage frequencies in mature naïve B cells are represented for 11 healthy controls and 7 AID-deficient patients. Sequences from 409 healthy control and 172 AID-deficient single B cells were pooled. D and JH gene frequencies are represented in **(B)** and **(C)**, respectively. Statistically significant differences between patients and controls are indicated with stars. Nearly statistically significant differences are indicated with arrows.

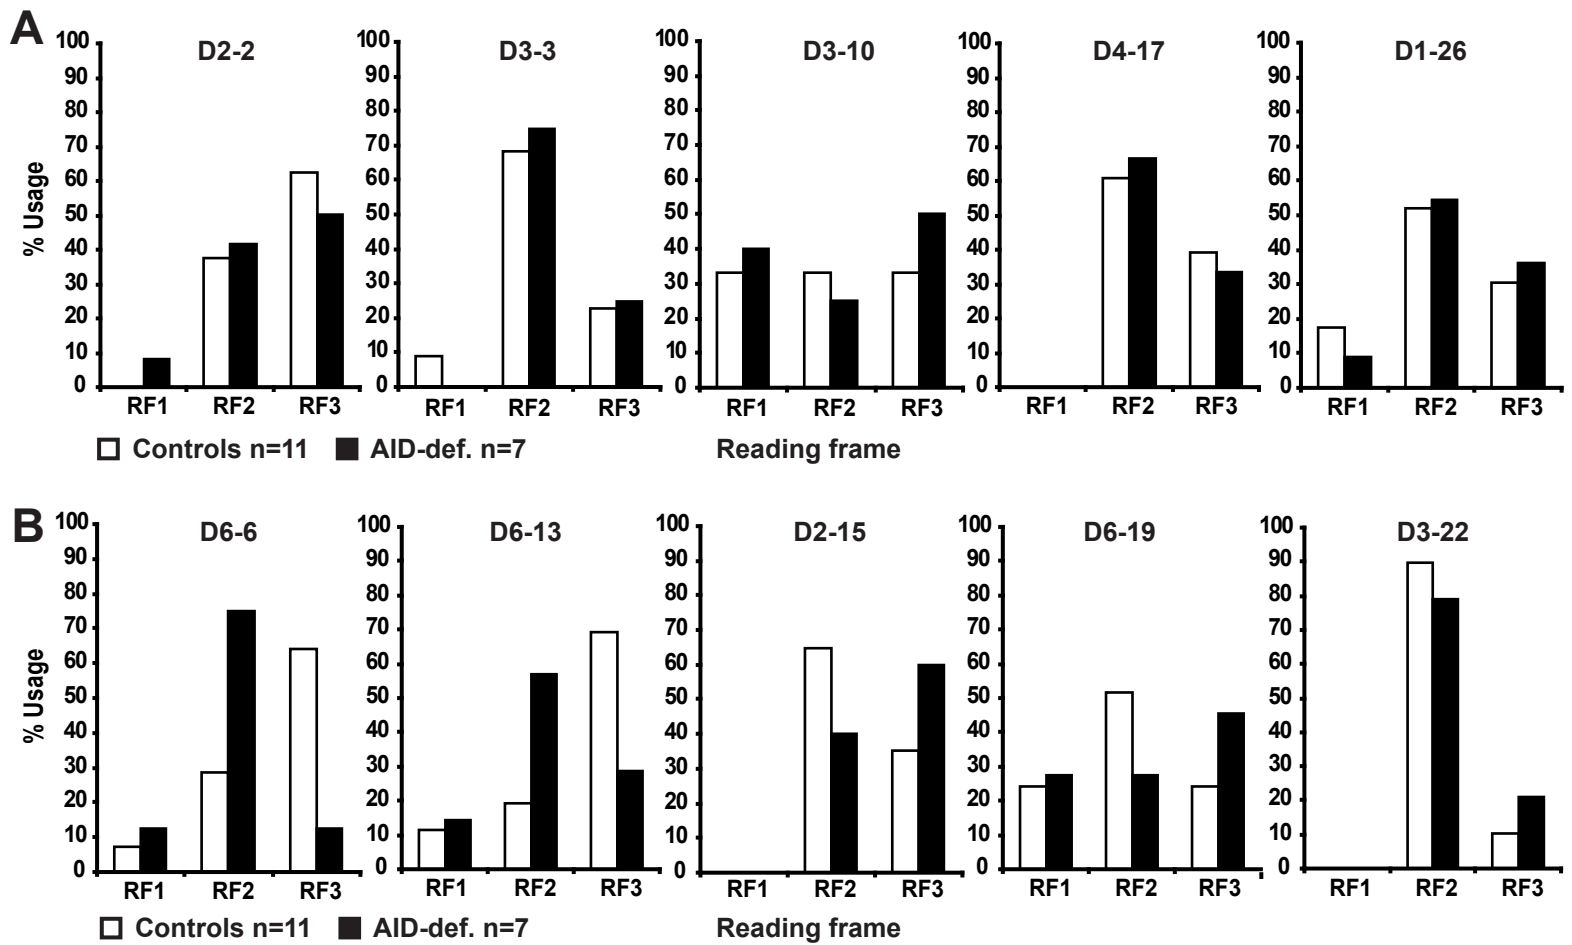

**Fig. S4.** Reading frame (RF) usages for frequently-used D genes are compared between mature naïve B cells from 11 healthy controls (open rectangles) and 7 AID-deficient patients (solid rectangles). **(A)** Half of the most-used D1, D2, D3 and D4 genes utilize similar reading frames in controls and patients. **(B)** In contrast, D6 and some D2 and D3 family members mostly utilize RF3 encoding hydrophobic residues favoring autoreactivity.

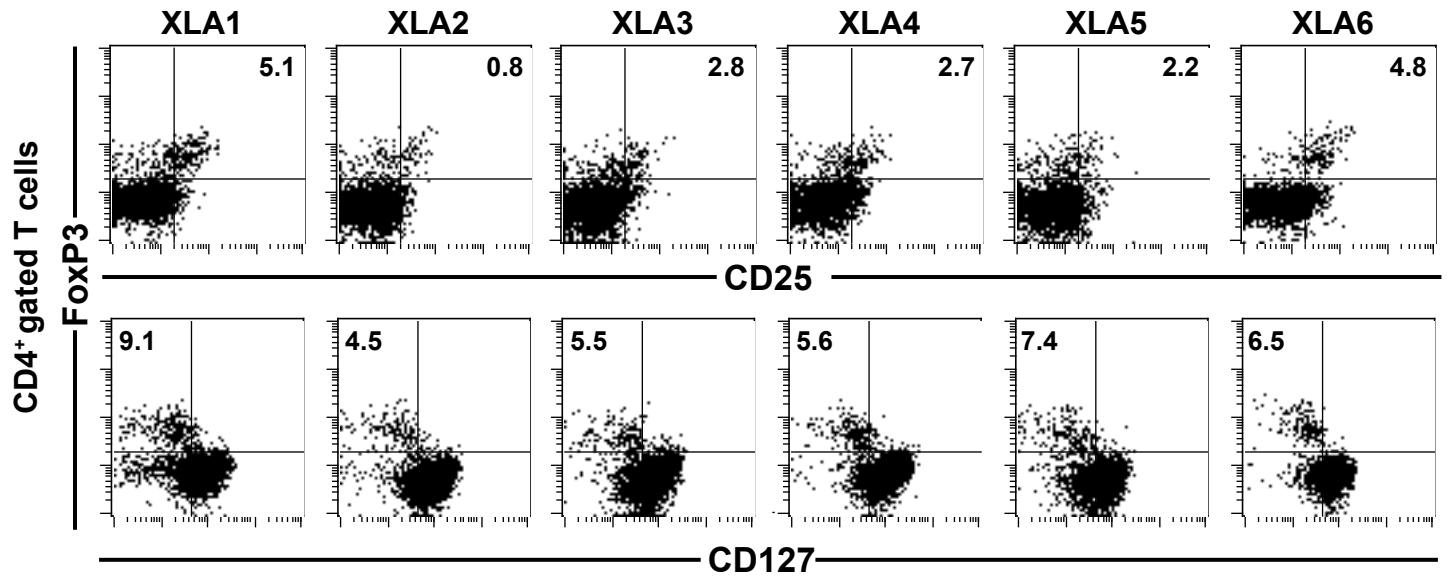

**Fig. S5.** Low Treg cell frequency in XLA patients. Treg cell frequencies among peripheral CD4<sup>+</sup> T cells were assessed by analyzing the proportion of CD25<sup>+</sup> FoxP3<sup>+</sup> (top) and CD127<sup>-/-</sup> FoxP3<sup>+</sup> (bottom) T cells from 6 XLA patients.

## Supporting Tables

**Table S1.** Characteristics of AID-deficient patients.

| Patient number | Ethnic group    | Sex | Age at diagnosis | Current age | Serum immunoglobins in mg/dl |      |     | Clinical Manifestations                          | Mutation in AICDA gene | Mutation in AID           |
|----------------|-----------------|-----|------------------|-------------|------------------------------|------|-----|--------------------------------------------------|------------------------|---------------------------|
|                |                 |     |                  |             | IgM                          | IgA  | IgG |                                                  |                        |                           |
| 1              | Moroccan        | M   | 5                | 22          | 240                          | <7   | 40  | lymphoid hyperplasia, recurrent infections       | 203G>A / 175-184 del   | W68X / H25 - E58 del insV |
| 2              | Moroccan        | M   | 1                | 16          | 150                          | <7   | <6  | recurrent infections                             | 203G>A / 175-184 del   | W68X / H25 - E58 del insV |
| 3              | Turkish         | M   | 45               | 51          | 1220                         | 42   | 170 | ITP, splenectomy, lymphoid hyperplasia, lymphoma | 522A>C / 522A>C        | R174S / R174S             |
| 4              | Moroccan        | M   | 1                | 20          | 100                          | <7   | <6  | lymphoid hyperplasia, recurrent infections       | 203G>A / del           | W68X / 0                  |
| 5              | Turkish         | M   | 11               | 21          | 1150                         | <5.8 | 264 | lymphoid hyperplasia, recurrent infections       | 415A>G / 415A>G        | M139V / M139V             |
| 6              | Pakistani       | M   | 4                | 4           | 4000                         | <7   | <7  | recurrent infections                             | 394G>C / 394G>C        | A132P / A132P             |
| 7              | French Canadian | F   | 2                | 22          | 479                          | <20  | na  | lymphoid hyperplasia, mild ITP                   | 334C>T / 334C>T        | R112C / R112C             |
| 8              | French Canadian | F   | 28               | 60          | 8830                         | <60  | na  | lymphoid hyperplasia, recurrent infections       | 334C>T / 334C>T        | R112C / R112C             |
| 9              | French Canadian | F   | 5                | 26          | 451                          | <30  | 178 | lymphoid hyperplasia, recurrent infections       | 334C>T / 334C>T        | R112C / R112C             |
| 10             | French Canadian | F   | 3                | 22          | 621                          | 40   | 60  | recurrent infections                             | 334C>T / 334C>T        | R112C / R112C             |
| 11             | French Canadian | M   | 2                | 50          | 6800                         | <60  | na  | recurrent infections                             | 334C>T / 334C>T        | R112C / R112C             |

na - not available

**Table S2.** Repertoire of antibodies from new emigrant B cells of AID-deficient patient 1.

| Ig        | HEAVY |      |    |    |                          |        |
|-----------|-------|------|----|----|--------------------------|--------|
|           | VH    | D    | RF | JH | CDR3 (aa)                | Length |
| neAID1 03 | 3-30  | 6-13 | 3  | 6  | DLNSGIAAAATSYYYGMDV      | 19     |
| neAID1 04 | 4-34  | 2-2  | 3  | 4  | GSIVVVPAQVAAPFDY         | 16     |
| neAID1 05 | 3-33  | 6-19 | 2  | 2  | DFAEDSSGWYPPSLGWYFDL     | 20     |
| neAID1 06 | 3-15  | 5-5  | 3  | 4  | AVDTALDY                 | 8      |
| neAID1 07 | 3-9   | 6-19 | 3  | 4  | GIHFVAPTRYFDY            | 14     |
| neAID1 08 | 4-61  | 5-24 | 2  | 4  | DNYNCPDY                 | 8      |
| neAID1 09 | 4-39  | 1-26 | 2  | 3  | RGYSGSYSFFGDAFDI         | 16     |
| neAID1 11 | 3-15  | 3-10 | 3  | 4  | TTDPAIPLRGVSPWDY         | 16     |
| neAID1 12 | 4-39  | 2-15 | 2  | 6  | HFRVGGGSGTGYYYMDV        | 17     |
| neAID1 13 | 3-23  | 2-21 | 3  | 4  | SHIVVVTAIWELDY           | 14     |
| neAID1 15 | 5-a   | 2-2  | 3  | 5  | GPDIVVVPAIGWWFDP         | 17     |
| neAID1 16 | 4-61  | 1-26 | 3  | 6  | ERGSIVGAHYYYGMDV         | 17     |
| neAID1 17 | 3-23  | 5-24 | 1  | 4  | DGLVERWLRNYFDY           | 14     |
| neAID1 19 | 3-23  | 3-3  | 2  | 6  | AVADDFWSGNYYYYGMDV       | 18     |
| neAID1 21 | 3-15  | 6-19 | 3  | 4  | DREAVAGTGHY              | 11     |
| neAID1 24 | 4-59  | 6-13 | 2  | 6  | VGYSWYDYYYGMDV           | 16     |
| neAID1 25 | 3-66  | /    | /  | 6  | HPPAGPFQANYYYYMDV        | 18     |
| neAID1 27 | 1-8   | 6-6  | 3  | 6  | QSARLYYYGMDV             | 13     |
| neAID1 28 | 4-31  | 2-15 | 2  | 3  | EGLWDCSGGSCYQIDAFDI      | 20     |
| neAID1 29 | 1-2   | 2-2  | 2  | 6  | GYCSSTSCFLSHTRYYYGMDV    | 21     |
| neAID1 30 | 4-34  | 2-21 | 3  | 4  | GGRKGVVTAITY             | 12     |
| neAID1 31 | 3-53  | 5-12 | 3  | 6  | AVFVATIRETYGMDV          | 15     |
| neAID1 32 | 3-66  | 2-21 | 2  | 4  | GALPYCGGDCYSHY           | 14     |
| neAID1 35 | 3-30  | 5-5  | 2  | 6  | GSDGYSYGSPYYYYGMDV       | 19     |
| neAID1 36 | 1-24  | 6-19 | 3  | 4  | VPRIAVAGYYFDY            | 13     |
| neAID1 37 | 4-39  | 3-22 | 3  | 3  | RTPTMIVVVDKDSPPDAFDI     | 20     |
| neAID1 38 | 4-39  | /    | /  | 4  | HGGLDPFDY                | 9      |
| neAID1 39 | 4-39  | 4-23 | 3  | 4  | LREAWATVTPYYFDY          | 17     |
| neAID1 40 | 3-15  | 5-5  | 2  | 3  | DYSPEPPYSYGTIDAFDI       | 18     |
| neAID1 41 | 3-9   | 1-26 | 3  | 5  | GSVGGRLGNWFDP            | 13     |
|           |       | 4-23 | 1  |    |                          |        |
| neAID1 42 | 4-34  | 2-2  | 2  | 6  | KGNCSTSCSPYGMDV          | 16     |
| neAID1 43 | 3-49  | 1-26 | 1  | 4  | VDTWELLRN                | 9      |
| neAID1 44 | 4-39  | 3-22 | 2  | 4  | HRTYYDSSGYPPFDY          | 15     |
| neAID1 45 | 1-2   | /    | /  | 5  | DLDRDWFDP                | 9      |
| neAID1 46 | 3-7   | /    | /  | 5  | DLVPVGVYSPRVGATSRESNWFDP | 25     |
| neAID1 47 | 3-23  | 3-3  | 2  | 5  | DPVRHTYYDFWSGYQNWFDP     | 20     |
| neAID1 48 | 3-11  | 3-22 | 2  | 3  | DGPYYYDRSAFDI            | 13     |

RF, reading frame

**Table S3.** Repertoire of antibodies from mature naïve B cells of AID-deficient patient 1.

| Ig       | HEAVY  |      |    |    |                            |        |
|----------|--------|------|----|----|----------------------------|--------|
|          | VH     | D    | RF | JH | CDR3 (aa)                  | Length |
| mAID1 01 | 4-59   | 6-13 | 2  | 5  | QREGSSSWYKRAWFDP           | 17     |
| mAID1 02 | 3-74   | 2-15 | 3  | 4  | DLEDIVVVVAATTFGY           | 16     |
| mAID1 03 | 3-48   | /    | /  | 6  | ANAGGRNYYYYGMDV            | 15     |
| mAID1 04 | 3-64   | 3-3  | 2  | 6  | GWAGGGYPHDYYMDV            | 15     |
| mAID1 06 | 4-34   | 3-22 | 2  | 4  | SLYDSSGTRGGFDY             | 15     |
| mAID1 07 | 3-48   | 6-13 | 2  | 4  | GGSSRA                     | 6      |
| mAID1 08 | 4-59   | /    | /  | 6  | SPVADYYYYMDV               | 12     |
| mAID1 09 | 4-34   | 6-13 | 3  | 6  | GEAAAGNYYYYYMDV            | 16     |
| mAID1 10 | 4-34   | 2-2  | 3  | 6  | DLGTADIVVPAAMMEDYYGMDV     | 23     |
| mAID1 11 | 4-34   | 3-3  | 3  | 6  | AITIFGVVIPTYYYYYMDV        | 19     |
| mAID1 14 | 3-23   | 3-22 | 2  | 4  | EYYDSSGYREPEIDY            | 15     |
| mAID1 21 | 3-49   | 2-2  | 2  | 4  | LQYEYCSSTSCLYFFDY          | 17     |
| mAID1 22 | 4-34   | 4-17 | 2  | 5  | THDDYGDSNWFDP              | 13     |
| mAID1 25 | 3-30-3 | 2-2  | 2  | 6  | DLYQLLPGYYYYYYMDV          | 17     |
| mAID1 27 | 3-21   | /    | /  | 6  | EGEGYYYGMDV                | 11     |
| mAID1 32 | 3-11   | 3-9  | 2  | 5  | DILTGASSLDP                | 11     |
| mAID1 36 | 3-33   | 1-7  | 3  | 5  | SGITGTTDRCWFDP             | 14     |
| mAID1 37 | 4-30-2 | 3-10 | 3  | 5  | RSITMVRGVISNWFDP           | 16     |
| mAID1 40 | 1-8    | 2-2  | 1  | 6  | TPENRYQLFPFASFSDPAYYYYGMDV | 26     |
| mAID1 41 | 3-23   | 6-6  | 1  | 6  | AGFKQLVPHLYYYGMDV          | 17     |
| mAID1 43 | 4-39   | 6-6  | 2  | 4  | LNEYSSSTFDY                | 11     |
| mAID1 46 | 4-59   | 2-2  | 3  | 6  | DRGVVPAAMHMDV              | 13     |
| mAID1 48 | 3-21   | 3-22 | 3  | 4  | GRTMIVVVTNPFDY             | 14     |

RF, reading frame



**Table S4.** Repertoire and reactivity of antibodies from new emigrant B cells of AID-deficient patient 2.

| Ig          | HEAVY  |      |    |    |                    |        | LIGHT |    |             |        |      |      | REACTIVITY |  |  |
|-------------|--------|------|----|----|--------------------|--------|-------|----|-------------|--------|------|------|------------|--|--|
|             | VH     | D    | RF | JH | CDR3 (aa)          | Length | Vκ    | Jκ | CDR3 (aa)   | Length | Poly | Hep2 | Staining   |  |  |
| neAID2 02   | 4-34   | 6-6  | 2  | 4  | SWEYSSSRCCLDY      | 13     | 3-20  | 1  | QQYGKT      | 6      | -    | +    | c          |  |  |
| neAID2 08 # | 4-30-4 | 6-13 | 2  | 4  | SGYSSSWLLFDY       | 12     | 1-5   | 4  | QQYNSYSLT   | 9      |      |      |            |  |  |
| neAID2 12   | 3-11   | 2-2  | 3  | 5  | DVGGLVVVPAASWFDP   | 16     | 1-39  | 2  | QQSYSTPGYT  | 10     | +    | +    | c          |  |  |
| neAID2 19   | 3-7    | 3-22 | 2  | 3  | EGRDYDSSGPRNAFDI   | 17     | 3-20  | 2  | QQYGSSPRYT  | 10     | -    | -    | -          |  |  |
| neAID2 20   | 4-61   | 2-21 | 3  | 5  | ELMVVTAYHNWFDP     | 14     | 1-8   | 4  | QQYYSYPLT   | 10     | +    | +    | c          |  |  |
| neAID2 28   | 4-30-4 | /    | /  | 6  | EALTLRRAIYMDV      | 14     | 3-20  | 1  | QQYGSSPRT   | 9      | +    | +    | -          |  |  |
| neAID2 29   | 3-23   | 1-26 | 2  | 4  | IPGRVSDDSGGH       | 12     | 1-39  | 2  | QQSYSTPLGYT | 11     | -    | -    | -          |  |  |
| neAID2 31   | 1-18   | 3-22 | 2  | 4  | DKDSSGYGY          | 10     | 1-5   | 4  | QQYNSL      | 6      | -    | -    | -          |  |  |
| neAID2 35   | 4-34   | 3-16 | 1  | 4  | LMTGLGELS          | 9      | 3-11  | 2  | QQRSNWSYT   | 9      | +    | +    | -          |  |  |
| neAID2 36   | 4-34   | 3-3  | 1  | 4  | ATSVLRFLEWLSTYYFDY | 18     | 3-11  | 3  | QQRSNWPL    | 8      | +    | +2   | -          |  |  |
| neAID2 37   | 3-21   | 3-22 | 2  | 4  | LRGSGYYYASYFDY     | 15     | 3-11  | 2  | QQRSNWPPGYT | 11     | +2   | +2   | F          |  |  |
| neAID2 38   | 3-11   | 2-2  | 2  | 4  | DPNPLYCSSTSCYVVDY  | 17     | 1-5   | 5  | QQYNSYSIT   | 9      | -    | -    | -          |  |  |
| neAID2 41   | 1-3    | /    | /  | 4  | DKGDETLDSYFDY      | 13     | 1-12  | 3  | QQANSFPFT   | 9      | -    | -    | -          |  |  |
| neAID2 42   | 4-34   | 3-22 | 2  | 6  | VGDYDSSGNYMDV      | 14     | 1-5   | 2  | QQYNSYSYT   | 9      | -    | -    | -          |  |  |
| neAID2 43   | 1-18   | 4-17 | 2  | 2  | DALRRYGDYHYLYWYFDL | 19     | 3-20  | 1  | QQYGSSLWT   | 9      | -    | +    | -          |  |  |
| neAID2 45   | 3-23   | 3-10 | 2  | 4  | GGLDYYGSGSYFDY     | 14     | 1-8   | 3  | QQYYSYPT    | 9      | +    | +    | F          |  |  |
| neAID2 01   |        |      |    |    |                    |        | 1-39  | 1  | QQSYSTPWT   | 9      |      |      |            |  |  |
| neAID2 03   |        |      |    |    |                    |        | 2-28  | 1  | MQALQTPGTWT | 11     |      |      |            |  |  |
| neAID2 07   |        |      |    |    |                    |        | 1-5   | 5  | QQYNSYSQIT  | 10     |      |      |            |  |  |
| neAID2 10   |        |      |    |    |                    |        | 4-1   | 4  | QQYYSTPLT   | 9      |      |      |            |  |  |
| neAID2 15   |        |      |    |    |                    |        | 1-5   | 1  | QQYNSYSPWT  | 10     |      |      |            |  |  |
| neAID2 26   |        |      |    |    |                    |        | 3-20  | 1  | QQYGSSPPWT  | 10     |      |      |            |  |  |
| neAID2 32   |        |      |    |    |                    |        | 1-5   | 2  | QQYNSYLHT   | 9      |      |      |            |  |  |
| neAID2 34   |        |      |    |    |                    |        | 3D-20 | 4  | QQYGSSPLT   | 9      |      |      |            |  |  |
| neAID2 40   |        |      |    |    |                    |        | 3-15  | 2  | QQYNNWPHT   | 9      |      |      |            |  |  |
| neAID2 46   |        |      |    |    |                    |        | 1-39  | 3  | QQSYSTPIT   | 9      |      |      |            |  |  |
|             | VH     | D    | RF | JH | CDR3 (aa)          | Length | Vλ    | Jλ | CDR3 (aa)   | Length | Poly | Hep2 | Staining   |  |  |
| neAID2 14 # | 3-23   | 3-22 | 2  | 4  | DRDLQHYSYGYYPEYFDY | 19     | 3-10  | 3  | YSTDSSGSV   | 9      |      |      |            |  |  |
| neAID2 17   | 3-43   | 1-26 | 2  | 4  | DFTTSGSYEVPDY      | 14     | 1-47  | 3  | AAWDDNLSGWV | 11     | -    | -    | -          |  |  |
| neAID2 22   | 1-2    | 6-19 | 1  | 4  | QQWLVRGVGNFDY      | 13     | 1-44  | 3  | AAWDDSLNGPV | 11     | +    | +    | -          |  |  |
| neAID2 23   | 4-34   | 4-4  | 2  | 5  | GGRNYVPPSEWFDP     | 15     | 2-11  | 2  | CSYAGSYTFV  | 10     | -    | -    | -          |  |  |
| neAID2 47   | 4-31   | 4-4  | 3  | 3  | AGSTTVTTGYAFDI     | 14     | 3-21  | 2  | QVWDDSSDHVV | 11     | -    | -    | -          |  |  |
|             | VH     | D    | RF | JH | CDR3 (aa)          | Length | V     | J  | CDR3 (aa)   | Length | Poly | Hep2 | Staining   |  |  |
| neAID2 11   | 3-21   | 3-22 | 3  | 4  | DNTMIVVVIDY        | 11     |       |    |             |        |      |      |            |  |  |

RF, reading frame; #, antibody failed to be expressed

-, non-reactive; +, reactive; +2, highly reactive

c, diffuse cytoplasmic staining; A, actin staining; G, Golgi staining; M, mitochondria staining; MS, mitotic spindle staining; N, nuclear staining; F, cytoplasmic fibers

**Table S5.** Repertoire and reactivity of antibodies from mature naïve B cells of AID-deficient patient 2.

| Ig         | HEAVY  |      |    |    |                            | LIGHT  |      |    |              |        | REACTIVITY |      |          |
|------------|--------|------|----|----|----------------------------|--------|------|----|--------------|--------|------------|------|----------|
|            | VH     | D    | RF | JH | CDR3 (aa)                  | Length | Vκ   | Jκ | CDR3 (aa)    | Length | Poly       | Hep2 | Staining |
| mAID2 01 # | 3-23   | 3-3  | 2  | 4  | RFDYDFWSGYTDDY             | 14     | 1-6  | 5  | LQDYNYPPIT   | 10     |            |      |          |
| mAID2 02   | 4-31   | 2-21 | 2  | 4  | APSLAYCGGDCYSMVSHFDY       | 20     | 1-39 | 4  | QQSYSTPLT    | 9      | -          | -    | -        |
| mAID2 04   | 1-18   | 6-13 | 2  | 6  | DLRAVETHDPYSSSWYLGPFYGMVDV | 25     | 3-11 | 5  | QQRGNT       | 6      | +          | +    | -        |
| mAID2 07   | 4-34   | 1-26 | 1  | 4  | GGQELLRRRQTKGGFDY          | 17     | 1-27 | 1  | QKYNSAPRT    | 9      | +2         | +2   | N        |
| mAID2 11 # | 3-30-3 | 2-21 | 3  | 6  | GVVTEYYYYYMDV              | 13     | 3-15 | 4  | QQYNNWPPL    | 9      |            |      |          |
| mAID2 15   | 3-30   | 3-3  | 2  | 6  | DGNYDFWSGYTWPVYYYYMDV      | 22     | 3-15 | 3  | QQYNNWPL     | 8      | +2         | +    | N        |
| mAID2 17   | 3-49   | 3-16 | 3  | 4  | VDMITFGGVRGEDY             | 14     | 3-11 | 4  | QQRSNWPLT    | 9      | -          | +    | -        |
| mAID2 18   | 4-59   | 4-17 | 2  | 2  | PLDGDYWFYDL                | 11     | 4-1  | 4  | QQYYSTPLT    | 9      | -          | -    | -        |
| mAID2 24   | 3-11   | 2-21 | 2  | 1  | DTCGGNCYSGSVEYFQH          | 17     | 1-5  | 1  | QQYNSYLRT    | 9      | -          | -    | -        |
| mAID2 29 # | 4-34   | 3-10 | 1  | 4  | AIGYKLWFGELSLSTPYFFDY      | 21     | 1-27 | 5  | QKYNSAPLT    | 9      |            |      |          |
| mAID2 40   | 3-15   | 1-1  | 2  | 6  | TSRNWNDGYYYYYMDV           | 16     | 3-20 | 1  | QQYGSSRWT    | 9      | -          | -    | -        |
| mAID2 45   | 3-43   | 3-22 | 2  | 4  | DAVGGYYYVFDY               | 12     | 1-5  | 3  | QQYNSYPIT    | 9      | -          | -    | -        |
| mAID2 48   | 4-59   | 6-13 | 2  | 3  | DQHSSSWYDAFDI              | 13     | 1-8  | 1  | QQYYSPRT     | 9      | +          | +    | c        |
|            | VH     | D    | RF | JH | CDR3 (aa)                  | Length | Vλ   | Jλ | CDR3 (aa)    | Length | Poly       | Hep2 | Staining |
| mAID2 01   |        |      |    |    | see kappa                  |        | 1-40 | 1  | QSYDSSLGSEV  | 12     | -          | -    | -        |
| mAID2 10   | 4-34   | 6-6  | 2  | 3  | RTSEYSSSGGAFDI             | 14     | 1-44 | 3  | AAWDDSLNGPV  | 11     | -          | -    | -        |
| mAID2 13   | 3-7    | /    | /  | 2  | ITAAWGLTWYFDL              | 13     | 3-21 | 3  | QVWDDSSDHPWV | 12     | -          | -    | -        |
| mAID2 16   | 4-34   | 6-19 | 1  | 4  | KAEWLAKIDY                 | 10     | 1-51 | 2  | GTWDSSLSAVV  | 11     | +          | +    | -        |
| mAID2 28   | 4-34   | 6-19 | 2  | 4  | ASSGWYADY                  | 9      | 6-57 | 3  | QSYDSSNPWV   | 10     | +          | +    | -        |
| mAID2 29 # |        |      |    |    | see kappa                  |        | 1-47 | 1  | AAWDDSLSGPGV | 12     |            |      |          |
| mAID2 37   | 3-11   | 5-12 | 3  | 4  | AGGRLATRFDY                | 11     | 2-14 | 2  | SSYTSSSTL    | 9      | +2         | -    | -        |
| mAID2 43   | 3-30-3 | 3-3  | 2  | 6  | EHGDFWSGYSTRYYYYMDV        | 17     | 2-23 | 1  | CSYAGSSTSLYV | 12     | +          | +    | -        |
| mAID2 46   | 1-18   | 4-17 | 2  | 4  | DQDYGDYFYY                 | 10     | 2-11 | 3  | CSYAGSYTWW   | 10     | -          | -    | -        |

RF, reading frame; #, antibody failed to be expressed

-, non-reactive; +, reactive; +2, highly reactive

c, diffuse cytoplasmic staining; A, actin staining; G, Golgi staining; M, mitochondria staining; MS, mitotic spindle staining; N, nuclear staining; F, cytoplasmic fibers

**Table S6.** Repertoire of antibodies from new emigrant B cells of AID-deficient patient 3.

| Ig        | HEAVY  |      |    |    |                            |        | LIGHT |      |             |        |                   |        |      |    |           |        |
|-----------|--------|------|----|----|----------------------------|--------|-------|------|-------------|--------|-------------------|--------|------|----|-----------|--------|
|           | VH     | D    | RF | JH | CDR3 (aa)                  | Length | Vκ    | Jκ   | CDR3 (aa)   | Length |                   |        |      |    |           |        |
| neAID3 3  | 3-30   | 4-17 | 3  | 4  | GGGTVTTWGGFDY              | 13     | 2-28  | 4    | MQALQTPLT   | 9      |                   |        |      |    |           |        |
| neAID3 6  | 3-66   | 6-13 | 3  | 6  | ERGLGIAAAGNYYYGMDV         | 18     | 1-39  | 2    | QQSYSTPYT   | 9      |                   |        |      |    |           |        |
| neAID3 07 | 1-2    | 2-15 |    | 4  |                            |        | 3-15  | 1    | QQYNNWPPWT  | 10     |                   |        |      |    |           |        |
| neAID3 08 | 3-30   | 4-23 | 2  | 6  | NGPPGSHGGMDYYGMDV          | 17     | 2-28  | 1    | MQALQTPT    | 8      |                   |        |      |    |           |        |
| neAID3 12 | 4-34   | 1-26 | 2  | 4  | GGGSPIDY                   | 8      | 3-20  | 1    | QQYGSSPPWT  | 10     |                   |        |      |    |           |        |
| neAID3 15 | 3-15   | /    | /  | 4  | DAPSQFYFDY                 | 10     | 1-39  | 1    | QQSYSTPQT   | 9      |                   |        |      |    |           |        |
| neAID3 20 | 3-30   | 6-13 | 3  | 4  | GGQAAAGTRGGLDDY            | 15     | 1-17  | 1    | LQHNSYPWT   | 9      |                   |        |      |    |           |        |
| neAID3 23 | 4-34   | 6-13 | 3  | 4  | ALGIAAAEFFDY               | 12     | 3-20  | 3    | QQYGSSSFT   | 9      |                   |        |      |    |           |        |
| neAID3 31 | 3-30   | 3-22 | 2  | 4  | DGPIYDSSVYTPVAEPRRIDY      | 21     | 1-5   | 1    | QQYNSEWT    | 8      |                   |        |      |    |           |        |
| neAID3 33 | 3-72   | /    | /  | 6  | HVGGVGHYYYGMDV             | 14     | 2D-29 | 4    | MQSIQLPLT   | 9      |                   |        |      |    |           |        |
| neAID3 34 | 3-15   | 4-4  | 3  | 6  | DISTVTNKNNYYYGMDV          | 17     | 3-15  | 2    | QQYNNWPPYT  | 10     |                   |        |      |    |           |        |
| neAID3 38 | 4-34   | /    | /  | 6  | RSRRGLTLRQYYYGMDV          | 17     | 2-28  | 2    | MQALQTLT    | 8      |                   |        |      |    |           |        |
| neAID3 41 | 4-34   | 5-5  | 3  | 4  | GVDTAMVWGYFDY              | 13     | 1-5   | 2    | QQYNSYYT    | 8      |                   |        |      |    |           |        |
| neAID3 45 | 1-18   | 3-10 | 2  | 4  | AQYYYGSGSYPSDY             | 14     | 3-20  | 2    | QQYGSSPET   | 9      |                   |        |      |    |           |        |
| neAID3 48 | 1-69   | 5-24 | 3  | 4  | AATTEYEAGFDY               | 12     | 2-28  | 2    | MQALQTPQT   | 9      |                   |        |      |    |           |        |
| neAID3 01 |        |      |    |    |                            |        | 1-39  | 1    | QQSYSTPWT   | 9      |                   |        |      |    |           |        |
| neAID3 10 |        |      |    |    |                            |        | 3-15  | 2    | QQYNNWPLT   | 9      |                   |        |      |    |           |        |
| neAID3 13 |        |      |    |    |                            |        | 4-1   | 1    | QQYYSTPRT   | 9      |                   |        |      |    |           |        |
| neAID3 16 |        |      |    |    |                            |        | 1-16  | 4    | QQYNSYPLT   | 9      |                   |        |      |    |           |        |
| neAID3 17 |        |      |    |    |                            |        | 3-20  | 1    | QQYGSSRWT   | 9      |                   |        |      |    |           |        |
| neAID3 18 |        |      |    |    |                            |        | 3-11  | 4    | QQRSNWPLT   | 9      |                   |        |      |    |           |        |
| neAID3 24 |        |      |    |    |                            |        | 1-27  | 4    | QKYNAPLT    | 9      |                   |        |      |    |           |        |
| neAID3 39 |        |      |    |    |                            |        | 1-9   | 3    | QQLNSYLFT   | 9      |                   |        |      |    |           |        |
|           |        |      |    |    |                            |        | VH    | D    | RF          | JH     | CDR3 (aa)         | Length | Vλ   | Jλ | CDR3 (aa) | Length |
| neAID3 04 |        |      |    |    |                            |        | 1-46  | 3-22 | 3           | 1      | DLISGIVPPRGVCYFQH | 18     | 2-14 | 1  | SSYSSSSTP | 9      |
| neAID3 09 | 3-23   | /    | /  | 5  | DGGVAELDP                  | 9      | 2-8   | 1    | SSYAGSNLGV  | 11     |                   |        |      |    |           |        |
| neAID3 21 | 3-21   | 6-13 | 2  | 6  | DLNSSWYEEEEYGGMDV          | 17     | 2-8   | 1    | SSYAGSNHYV  | 10     |                   |        |      |    |           |        |
| neAID3 35 | 3-23   | 6-13 | 2  | 6  | DLDEGRSLSLPEDSSTWDYYYYGMDV | 26     | 3-1   | 2    | QAWDSSIVV   | 9      |                   |        |      |    |           |        |
| neAID3 42 | 3-7    | 2-15 | 2  | 3  | GYCSGGSCYSVDAFDI           | 16     | 3-21  | 2    | QVWDSSSDHVV | 11     |                   |        |      |    |           |        |
| neAID3 44 | 4-39   | 1-1  | 3  | 4  | HGTTGTTRYIDY               | 12     | 1-40  | 3    | QSYDSSLGWW  | 11     |                   |        |      |    |           |        |
| neAID3 22 |        |      |    |    |                            |        | 1-44  | 3    | AAWDDSLNGRV | 11     |                   |        |      |    |           |        |
| neAID3 36 |        |      |    |    |                            |        | 3-1   | 2    | QAWDSSTVV   | 9      |                   |        |      |    |           |        |
|           | VH     | D    | RF | JH | CDR3 (aa)                  | Length | V     | J    | CDR3 (aa)   | Length |                   |        |      |    |           |        |
| neAID3 05 | 4-59   | 6-13 | 2  | 3  | SYSSSGDAFDI                | 12     |       |      |             |        |                   |        |      |    |           |        |
| neAID3 11 | 3-30-3 | 1-26 | 3  | 3  | DYTRRSIVGARGAFDI           | 16     |       |      |             |        |                   |        |      |    |           |        |
| neAID3 25 | 3-11   | 3-3  | 2  | 6  | AGYDFWSAHYKASDGMDV         | 18     |       |      |             |        |                   |        |      |    |           |        |
| neAID3 26 | 3-48   | 6-6  | 2  | 4  | GLDYSSSSAVGY               | 12     |       |      |             |        |                   |        |      |    |           |        |
| neAID3 28 | 3-15   | 5-5  | 2  | 4  | GGYSYDKTRSLTGDSN           | 16     |       |      |             |        |                   |        |      |    |           |        |
|           |        | 7-27 | 3  |    |                            |        |       |      |             |        |                   |        |      |    |           |        |
| neAID3 43 | 3-23   | 2-21 | 1  | 4  | DRLFQPAYYFDY               | 12     |       |      |             |        |                   |        |      |    |           |        |
| neAID3 46 | 4-34   | 6-13 | 2  | 5  | DYSSRRWFDP                 | 11     |       |      |             |        |                   |        |      |    |           |        |
| neAID3 47 | 3-30-3 | 6-13 | 3  | 6  | DDAAAAGKSPSPYYYYGMDV       | 20     |       |      |             |        |                   |        |      |    |           |        |

RF, reading frame

**Table S7.** Repertoire of antibodies from mature naïve B cells of AID-deficient patient 3.

| Ig       | HEAVY  |      |    |    |                        | Length |
|----------|--------|------|----|----|------------------------|--------|
|          | VH     | D    | RF | JH | CDR3 (aa)              |        |
| mAID3 04 | 3-30-3 | /    | /  | 4  | DRGAVIGLVDY            | 11     |
| mAID3 05 | 3-48   | 3-22 | 2  | 3  | VGFYDDAFDI             | 10     |
| mAID3 06 | 1-18   | 2-2  | 2  | 6  | DLGYCSSTSCSPPDYYYYGMDV | 22     |
| mAID3 07 | 3-64   | /    | /  | 6  | SLEDRNPYYYYGMDV        | 15     |
| mAID3 09 | 3-21   | 2-2  | 2  | 5  | EGYCSSTSCNWGNWFDP      | 17     |
| mAID3 10 | 3-23   | 6-6  | 3  | 6  | NERIAAPPPDGMDV         | 14     |
| mAID3 12 | 3-7    | 3-10 | 3  | 4  | AVTMDGWGYFDY           | 12     |
| mAID3 13 | 3-49   | /    | /  | 4  | DVEDY                  | 5      |
| mAID3 14 | 3-23   | 3-22 | 2  | 4  | AGNYDSSGPTGGY          | 14     |
| mAID3 15 | 3-30   | 2-15 | 3  | 5  | EGVVAAYSSYNWFDP        | 15     |
| mAID3 16 | 4-4    | 2-2  | 3  | 6  | AIAAIGNYYYYGMDV        | 15     |
| mAID3 17 | 3-30   | 6-13 | 3  | 5  | DWLIAAAQRFNWFDP        | 15     |
| mAID3 18 | 4-34   | 6-13 | 1  | 6  | GWVRSRQLVEHYGMDV       | 18     |
| mAID3 19 | 3-30   | 3-22 | 3  | 4  | GAKTTRLRSMIVEDYFDY     | 18     |
| mAID3 21 | 3-7    | 4-17 | 3  | 4  | ATVTTSFDY              | 9      |
| mAID3 22 | 3-66   | 4-23 | 3  | 4  | EAGTVGPTRREGYFDY       | 16     |
| mAID3 23 | 3-30-3 | 4-23 | 3  | 4  | GEVSVVTRSHFDY          | 13     |
| mAID3 24 | 1-69   | 3-10 | 1  | 6  | ASEGFGELLPRHSDYGMDV    | 19     |
| mAID3 25 | 3-48   | 2-15 | 2  | 4  | YYCSGGSCYSAFDY         | 14     |
| mAID3 27 | 4-34   | 6-13 | 1  | 5  | IRQQLPSGGVWFDP         | 15     |
| mAID3 34 | 3-15   | /    | /  | 4  | VFGETVSTSPG            | 11     |
| mAID3 35 | 4-34   | 2-21 | 3  | 4  | GHIVVTARRYFDY          | 15     |
| mAID3 36 | 3-7    | 6-19 | 3  | 4  | GGAVAGTGY              | 9      |
| mAID3 37 | 3-15   | 6-13 | 2  | 4  | AVSSWFDY               | 8      |
| mAID3 38 | 4-34   | 6-13 | 2  | 4  | GPTQYSSSWYIFPD         | 14     |
| mAID3 39 | 4-34   | 3-16 | 1  | 6  | GVRGLRLGELSPPAYGMDV    | 19     |
| mAID3 42 | 4-4    | 3-22 | 2  | 4  | RSYYDSSIGTLDY          | 13     |
| mAID3 44 | 3-33   | 3-22 | 2  | 3  | SRNYDSSGPMGAFDI        | 16     |
| mAID3 45 | 3-23   | 4-17 | 2  | 6  | YGDYVYDYYYYGMDV        | 14     |
| mAID3 46 | 3-7    | 1-26 | 2  | 4  | YRYSGSYDYFDY           | 13     |
| mAID3 48 | 4-b    | 1-26 | 2  | 4  | VWPYSGSYSTTKDDY        | 15     |

RF, reading frame

Table S8. Repertoire and reactivity of antibodies from new emigrant B cells of AID-deficient patient 4.

| Ig          | HEAVY  |      |    |    |                              | Length | LIGHT          |                |                   | Length | REACTIVITY |      |          |
|-------------|--------|------|----|----|------------------------------|--------|----------------|----------------|-------------------|--------|------------|------|----------|
|             | VH     | D    | RF | JH | CDR3 (aa)                    |        | V <sub>κ</sub> | J <sub>κ</sub> | CDR3 (aa)         |        | Poly       | Hep2 | Staining |
| neAID4 01   | 4-59   | 6-13 | 2  | 4  | GYSSSWYFGY                   | 10     | 4-1            | 1              | QQYYSTPWT         | 9      | -          | +    | -        |
| neAID4 08   | 4-59   | 2-2  | 3  | 3  | VGGPAVPASVAFDI               | 14     | 3-20           | 2              | QQYGSSPYT         | 9      | -          | +    | -        |
| neAID4 16 # | 3-23   | 1-26 | 3  | 6  | GVGATETIYYYYGMDV             | 16     | 2-40           | 4              | MQRIEFPST         | 9      |            |      |          |
| neAID4 17   | 4-34   | 3-3  | 2  | 6  | TDFWSGYFPIRYGMDV             | 16     | 3-15           | 1              | QQYNNWPRT         | 9      | +          |      | -        |
| neAID4 18   | 3-23   | 3-3  | 2  | 4  | QPHLEGVWSGYSFYFDY            | 18     | 4-1            | 1              | QQYYSTPPWT        | 10     | -          | -    | -        |
| neAID4 19   | 4-34   | 6-13 | 2  | 4  | GRYSSSFDY                    | 9      | 1-17           | 1              | LQHNSYPWT         | 9      | -          | +    | c        |
| neAID4 20   | 4-61   | 2-15 | 3  | 6  | SPVVVAAITNYYYGMDV            | 18     | 1-39           | 1              | QQSYSLPVT         | 9      | +          | +    | c        |
| neAID4 21   | 3-23   | 6-13 | 2  | 4  | HSSSWYSDY                    | 9      | 1-39           | 1              | QQSYSTRWT         | 9      | -          | -    | -        |
| neAID4 22 # | 3-23   | 1-26 | 2  | 6  | DIGGSYPENV                   | 10     | 2-30           | 2              | MQGTHWPPYT        | 10     |            |      |          |
| neAID4 31   | 4-34   | 4-17 | 2  | 4  | VSQRYGDDANDY                 | 12     | 1-16           | 2              | QQYNSYPYT         | 9      | -          | -    | -        |
| neAID4 33   | 3-23   | 5-5  | 2  | 4  | DLLGYGFFDY                   | 10     | 1-8            | 1              | QQYYSYPGT         | 9      | -          | -    | -        |
| neAID4 43   | 4-34   | 4-17 | 1  | 5  | VSPRLRLSPHFWD                | 15     | 3-11           | 1              | QQRSNWPWT         | 9      | +2         | +    | c        |
| neAID4 45   | 4-34   | 4-4  | 3  | 6  | VRVTLLDYYGMDV                | 14     | 3-15           | 1              | QQYNNWPRT         | 9      | -          | +    | -        |
| neAID4 47   | 3-7    | 3-22 | 2  | 6  | DTYSSNYYYYGMDV               | 15     | 3-20           | 1              | QQYGSSPSSPLANGVGV | 17     | -          | -    | -        |
| neAID4 06   |        |      |    |    |                              |        | 3-11           | 4              | QQRSNWLP          | 8      |            |      |          |
| neAID4 26   |        |      |    |    |                              |        | 1-39           | 1              | QQSYSTPWT         | 9      |            |      |          |
| neAID4 28   |        |      |    |    |                              |        | 2-28           | 1              | MQALQTPWT         | 9      |            |      |          |
| neAID4 36   |        |      |    |    |                              |        | 2-28           | 2              | MQALQTPYT         | 9      |            |      |          |
| neAID4 40   |        |      |    |    |                              |        | 1-8            | 4              | QQYYSYPLT         | 9      |            |      |          |
| neAID4 44   |        |      |    |    |                              |        | 3-11           | 1              | QQRSNWPPWT        | 10     |            |      |          |
| neAID4 46   |        |      |    |    |                              |        | 1-39           | 5              | QQSYSTPQVT        | 10     |            |      |          |
|             | VH     | D    | RF | JH | CDR3 (aa)                    | Length | V <sub>λ</sub> | J <sub>λ</sub> | CDR3 (aa)         | Length | Poly       | Hep2 | Staining |
| neAID4 05   | 1-46   | 6-6  | 2  | 6  | YSSSSGREGGQGVGTPRVSYYYYYGMDV | 27     | 2-14           | 2              | SSYTSSSTLV        | 10     | +          | +    | -        |
| neAID4 07   | 3-73   | /    | /  | 6  | DLRYGMDV                     | 8      | 2-8            | 1              | SSYAGSNNFV        | 10     | +          | +    | -        |
| neAID4 13   | 4-59   | 6-19 | 3  | 4  | VWAGTSFVFDY                  | 11     | 1-51           | 2              | GTWDSLSAVV        | 11     | -          | -    | -        |
| neAID4 16   |        |      |    |    | see kappa                    |        | 3-21           | 1              | QVWDSSSDHYV       | 11     | -          | -    | -        |
| neAID4 23   | 3-7    | 2-15 | 2  | 3  | DEYCSGGSCYPPDAFDI            | 17     | 1-44           | 3              | AAWDDSLNGWV       | 11     | -          | -    | -        |
| neAID4 34   | 3-9    | 2-2  | 1  | 6  | DISGYQLRLYYGMDV              | 15     | 1-44           | 2              | AAWDDSLNGFVV      | 12     | -          | -    | -        |
| neAID4 39   | 4-39   | 3-22 | 2  | 4  | DQVEERYYYDSSGYSRWGY          | 20     | 2-14           | 2              | SSYTSSSTLVV       | 11     | -          | -    | -        |
| neAID4 41   | 4-b    | 3-10 | 2  | 4  | SPGPYYYGSGSYCGY              | 15     | 1-47           | 2              | AAWDDSLSGHVV      | 12     | -          | +    | N+MS     |
| neAID4 14   |        |      |    |    |                              |        | 3-25           | 3              | QSADSSGTYPWV      | 12     |            |      |          |
|             | VH     | D    | RF | JH | CDR3 (aa)                    | Length | V              | J              | CDR3 (aa)         | Length | Poly       | Hep2 | Staining |
| neAID4 03   | 4-34   | 3-3  | 2  | 6  | GPHYDFWSGYDYYYYYGMDV         | 20     |                |                |                   |        |            |      |          |
| neAID4 09   | 4-59   | 3-16 | 1  | 4  | SLRGLGELSSQYYFDY             | 15     |                |                |                   |        |            |      |          |
| neAID4 15   | 3-15   | 2-2  | 2  | 6  | FYCSSTSCYRGYYYGMDV           | 19     |                |                |                   |        |            |      |          |
| neAID4 29   | 4-39   | 2-2  | 2  | 6  | ERGGGGYCSSTSCRGHYYYGMDV      | 24     |                |                |                   |        |            |      |          |
| neAID4 30   | 3-30-3 | 2-21 | 3  | 2  | AYLRGVVTAITLWYFDL            | 17     |                |                |                   |        |            |      |          |
| neAID4 38   | 4-b    | 3-3  | 3  | 5  | AGSGLITIFGVDSQWWFDP          | 19     |                |                |                   |        |            |      |          |
| neAID4 48   | 1-3    | 2-8  | 3  | 6  | DIVLMVYASNYYYGMDV            | 17     |                |                |                   |        |            |      |          |

RF, reading frame; #, antibody failed to be expressed

-, non-reactive; +, reactive; +2, highly reactive

c, diffuse cytoplasmic staining; A, actin staining; G, Golgi staining; M, mitochondria staining; MS, mitotic spindle staining; N, nuclear staining; F, cytoplasmic fibers

**Table S9.** Repertoire and reactivity of antibodies from mature naïve B cells of AID-deficient patient 4.

| Ig         | HEAVY |      |    |    |                       | LIGHT  |      |    |              |        | REACTIVITY |      |          |
|------------|-------|------|----|----|-----------------------|--------|------|----|--------------|--------|------------|------|----------|
|            | VH    | D    | RF | JH | CDR3 (aa)             | Length | Vκ   | Jκ | CDR3 (aa)    | Length | Poly       | Hep2 | Staining |
| mAID4 01   | 3-48  | 4-17 | 3  | 4  | GSTVTNRLGLTDY         | 13     | 4-1  | 1  | QQYYSTPPT    | 9      | -          | -    | -        |
| mAID4 11 # | 4-b   | 3-9  | 2  | 6  | EERYFDWFSGMDV         | 13     | 1-6  | 2  | LQDYNYPYT    | 9      |            |      |          |
| mAID4 14   | 3-9   | 3-16 | 2  | 4  | WGSYRHEVFDY           | 11     | 3-15 | 1  | QQYNNWPLTWT  | 11     | +          | +    | N        |
| mAID4 24   | 3-13  | 4-4  | 2  | 6  | APISDYSATPQVYGMDV     | 17     | 3-20 | 4  | QQYGSTQLT    | 9      | -          | -    | -        |
| mAID4 35   | 1-2   | 1-26 | 2  | 4  | TRYSGSYPDY            | 10     | 3-20 | 2  | QQYGSSYT     | 8      | -          | +    | -        |
| mAID4 36   | 4-b   | 2-2  | 3  | 6  | DTVVPAYYYYGMDV        | 14     | 3-20 | 2  | QQYGSSPYT    | 9      | +          | +    | -        |
| mAID4 37   | 3-33  | 6-6  | 2  | 6  | EYSSSLYYYGMDV         | 14     | 1-16 | 4  | QQYNSYPLT    | 9      | -          | +    | N        |
| mAID4 41   | 3-49  | 3-22 | 2  | 4  | DLSSPDSDSVKVPRHSYFDY  | 22     | 1-12 | 3  | QQANSFPFT    | 9      | -          | -    | -        |
| mAID4 42   | 3-21  | 3-10 | 3  | 5  | DRSVRGDYWFDP          | 12     | 3-15 | 1  | QQYNNWPT     | 8      | -          | +    | -        |
| mAID4 44   | 3-33  | 6-19 | 2  | 6  | DLGSGWYYYYGMDV        | 15     | 3-20 | 4  | QQYGSSPPLT   | 10     | +          | +    | -        |
|            | VH    | D    | RF | JH | CDR3 (aa)             | Length | Vλ   | Jλ | CDR3 (aa)    | Length | Poly       | Hep2 | Staining |
| mAID4 02   | 4-34  | 5-5  | 2  | 6  | GHRGYSYYYYGMDV        | 15     | 2-23 | 1  | CSYAGSKV     | 8      | +2         | +    | F        |
| mAID4 04   | 3-21  | 6-19 | 3  | 3  | IAVAGRAFDI            | 10     | 8-61 | 3  | VLYMGSLWV    | 10     | -          | +    | -        |
| mAID4 06   | 3-48  | 3-22 | 2  | 3  | DRVPPYDKGHDAFDI       | 15     | 3-1  | 2  | QAWDSSTVV    | 9      | -          | -    | -        |
| mAID4 08   | 1-8   | 3-16 | 2  | 6  | GGGYDYVWGSYWLDDYGGMDV | 22     | 2-11 | 3  | CSYAGSYTFWV  | 11     | +          | +2   | M        |
| mAID4 10   | 3-48  | 2-15 | 2  | 3  | WLCSGGSCYRQDAFDI      | 16     | 1-47 | 3  | AAWDDSLSGWV  | 11     | -          | +    | -        |
| mAID4 12   | 4-59  | 3-9  | 2  | 5  | ANILTGYYINNWFDP       | 15     | 1-44 | 3  | AAWDDSLNGPV  | 11     | -          | -    | -        |
| mAID4 16 # | 3-23  | 2-21 | 3  | 3  | DAVVVVTANDAFDI        | 14     | 2-14 | 1  | SSYTSSSTPV   | 10     |            |      |          |
| mAID4 19   | 3-23  | /    | /  | 3  | AGEAFDI               | 7      | 1-51 | 1  | GTWSSLSAYV   | 11     | -          | -    | -        |
| mAID4 23 # | 1-2   | /    | /  | 3  | ADEALAFDI             | 9      | 1-47 | 2  | AAWDDSLSAYVV | 12     |            |      |          |
| mAID4 25   | 1-18  | 3-3  | 2  | 6  | PSFEYDFWGSYEALVYGMDV  | 21     | 7-46 | 3  | LLSYSGARV    | 9      | +2         | +2   | -        |
| mAID4 26   | 3-23  | 3-10 | 3  | 4  | GVTMVRGVVDY           | 11     | 1-47 | 2  | AAWDDSLSGVV  | 11     | -          | -    | -        |
| mAID4 27   | 3-74  | 2-2  | 2  | 3  | WGPCSSTSCQEDAFDI      | 16     | 3-25 | 3  | QSADSSGTNWW  | 11     | -          | -    | -        |
| mAID4 33   | 3-33  | /    | /  | 4  | LSPFDY                | 6      | 1-44 | 3  | AAWDDSLNGRV  | 11     | -          | +    | -        |
| mAID4 34   | 3-23  | 6-13 | 3  | 4  | DPENSLVAAAGTGMDY      | 16     | 3-1  | 1  | QAWDSSTPYV   | 10     | -          | -    | -        |
| mAID4 44   |       |      |    |    | see kappa             |        | 2-23 | 2  | CSYAGSSTFV   | 10     | +2         | +    | N        |
|            | VH    | D    | RF | JH | CDR3 (aa)             | Length | V    | J  | CDR3 (aa)    | Length | Poly       | Hep2 | Staining |
| mAID4 22   | 5-51  | 5-24 | 2  | 1  | CSGRDGYNNRFQH         | 13     |      |    |              |        |            |      |          |
| mAID4 38   | 4-34  | 3-9  | 2  | 4  | GSHTYYDILTGHSYFDY     | 18     |      |    |              |        |            |      |          |
| mAID4 39   | 3-21  | 3-10 | 2  | 6  | KGSDYYGSGSYMDV        | 15     |      |    |              |        |            |      |          |

RF, reading frame; #, antibody failed to be expressed

-, non-reactive; +, reactive; +2, highly reactive

c, diffuse cytoplasmic staining; A, actin staining; G, Golgi staining; M, mitochondria staining; MS, mitotic spindle staining; N, nuclear staining; F, cytoplasmic fibers

**Table S10.** Repertoire and reactivity of antibodies from new emigrant B cells of AID-deficient patient 5.

| Ig          | HEAVY  |      |    |    |                            |        | LIGHT |    |             |        | REACTIVITY |      |          |
|-------------|--------|------|----|----|----------------------------|--------|-------|----|-------------|--------|------------|------|----------|
|             | VH     | D    | RF | JH | CDR3 (aa)                  | Length | Vκ    | Jκ | CDR3 (aa)   | Length | Poly       | Hep2 | Staining |
| neAID5 01   | 3-30   | /    | /  | 4  | ERHTDFDY                   | 8      | 1-12  | 2  | QQANSFPYT   | 9      | -          |      | -        |
| neAID5 03   | 1-3    | /    | /  | 4  | SFKSGRGVDY                 | 10     | 1-39  | 2  | QQSYSTPNT   | 9      | -          |      | N+C      |
| neAID5 04   | 5-51   | 3-10 | 2  | 2  | HKYYYGSGGAWYFDL            | 15     | 1-39  | 2  | QQSYSTPYT   | 9      | -          |      | C        |
| neAID5 05   | 3-15   | 4-4  | 2  | 6  | DLTHDYSNYYYYGMDV           | 16     | 3-15  | 3  | QQYNNWPT    | 8      | -          |      | -        |
| neAID5 07   | 4-34   | 4-23 | 2  | 4  | SSGGKILIRAGGYFDY           | 18     | 1-39  | 4  | QQSYSTPLT   | 9      | +          |      | C        |
| neAID5 12   | 4-34   | /    | /  | 4  | GDPDLLRYFDY                | 12     | 3-20  | 1  | QQYGSSPKWT  | 10     | -          |      | -        |
| neAID5 16   | 3-15   | 3-3  | 2  | 4  | VRYDFWSGYYEYFDY            | 15     |       |    | out         |        |            |      |          |
| neAID5 18   | 4-30-2 | /    | /  | 4  | GRQGVLKDY                  | 10     | 1-33  | 4  | QQYDNLPLT   | 9      | -          |      | -        |
| neAID5 20 # | 5-51   | /    | /  | 3  | SPGYAFDI                   | 8      | 4-1   | 1  | QQYYSTPRT   | 9      |            |      |          |
| neAID5 23   | 3-66   | /    | /  | 6  | DFVENYYYYGMDV              | 13     | 1-39  | 1  | QQSYSTPFT   | 9      | -          |      | -        |
| neAID5 24   | 3-11   | 2-2  | 3  | 4  | ALPRDIVVPAALARGI           | 17     | 1-9   | 1  | QQLNSYPRT   | 9      | +          |      | C        |
| neAID5 25   | 4-39   | 3-22 | 2  | 3  | DQYSSGYLNDAFDI             | 15     | 3-15  | 1  | QQYNNWPPWT  | 10     | +          |      | -        |
| neAID5 27   | 3-11   | 3-22 | 2  | 4  | DISYDTQSLWYFDY             | 14     | 1-5   | 2  | QQYNSYSRT   | 9      | -          |      | -        |
| neAID5 30   | 4-34   | 5-5  | 2  | 4  | EGRGYSYGFNY                | 11     | 1-39  | 3  | QQSYSTPFT   | 9      | -          |      | -        |
| neAID5 31 # | 1-2    | 6-13 | 3  | 5  | TVGAAAGTLDYWFDP            | 15     | 3-15  | 1  | QQYNNWPHT   | 9      |            |      |          |
| neAID5 02   | 3-43   | /    | /  | 3  | GDAFDI                     | 6      |       |    |             |        |            |      |          |
| neAID5 17   | 3-9    | 5-12 | 2  | 4  | DREVGYSGSRFDY              | 14     |       |    |             |        |            |      |          |
| neAID5 26   | 6-1    | 2-15 | 3  | 5  | NNVVVAATHRGFNWFDP          | 18     |       |    |             |        |            |      |          |
| neAID5 28   | 3-7    | 6-19 | 2  | 4  | ECRSSGWYFDY                | 12     |       |    |             |        |            |      |          |
|             | VH     | D    | RF | JH | CDR3 (aa)                  | Length | Vλ    | Jλ | CDR3 (aa)   | Length | Poly       | Hep2 | Staining |
| neAID5 06   | 3-30   | 6-13 | 2  | 4  | WGYSSSWYVPGY               | 12     | 1-51  | 2  | GTWDSSLSAVV | 11     | -          |      | C        |
| neAID5 08   | 3-7    | 6-19 | 3  | 4  | KTWKAGTDY                  | 9      | 2-14  | 1  | SSYTSSEV    | 9      | -          |      | -        |
| neAID5 20 # |        |      |    |    | see kappa                  |        | 2-14  | 2  | SSYTSSTRV   | 10     |            |      |          |
| neAID5 21   | 3-21   | /    | /  | 3  | VGWDRFEGVGMIVPAAERGIDDAFDI | 26     | 2-14  | 1  | SSYTSSTLYV  | 11     | +          |      | -        |

RF, reading frame; #, antibody failed to be expressed

-, non-reactive; +, reactive

c, diffuse cytoplasmic staining; A, actin staining; G, Golgi staining; M, mitochondria staining; MS, mitotic spindle staining; N, nuclear staining; F, cytoplasmic fibers

**Table S11.** Repertoire and reactivity of antibodies from mature naive B cells of AID-deficient patient 5.

| Ig         | HEAVY  |      |    |    |                   |        | LIGHT |    |             |        | REACTIVITY |      |          |
|------------|--------|------|----|----|-------------------|--------|-------|----|-------------|--------|------------|------|----------|
|            | VH     | D    | RF | JH | CDR3 (aa)         | Length | Vκ    | Jκ | CDR3 (aa)   | Length | Poly       | Hep2 | Staining |
| mAID5 13   | 3-23   | 6-13 | 2  | 4  | ILSSSWYGGDYFDY    | 14     | 3-15  | 1  | QQYNNWPQT   | 9      | -          | -    | -        |
| mAID5 15   | 1-18   | 3-16 | 3  | 4  | EKEGGLRPAFGDY     | 13     | 1-5   | 2  | QQYNSYYT    | 8      | -          | +    | -        |
| mAID5 18   | 4-30-4 | 4-23 | 2  | 3  | AGRYGGNHPLDAFDI   | 15     | 1-39  | 1  | QQSYSTPRT   | 9      | -          | +    | -        |
| mAID5 19   | 4-b    | 1-26 | 3  | 6  | VPTVGATIYGMDV     | 13     | 1-39  | 3  | QQSYSLFT    | 8      | +          | +    | -        |
| mAID5 21 # | 1-69   | 4-17 | 2  | 3  | DSPPHYGDLYAFDI    | 14     | 2-30  | 2  | MQGTHWPPT   | 9      |            |      |          |
| mAID5 23   | 3-49   | 3-10 | 1  | 6  | EHPLWFGDPNEGYGMDV | 17     | 3-11  | 2  | QQRSNWPRGT  | 10     | -          | -    | -        |
| mAID5 27   | 5-a    | /    | /  | 3  | HTKHVETNDAFDI     | 13     | 1-5   | 2  | QQYNSYSPHT  | 10     | -          | -    | -        |
| mAID5 29   | 1-18   | 4-17 | 2  | 4  | ENYGDYEH          | 8      | 3-11  | 4  | QQRSNWPSLT  | 10     | -          | +    | -        |
| mAID5 30   | 3-30   | 6-13 | 3  | 4  | DRVNIAAALGY       | 11     | 3-20  | 1  | QQYGSSPSWT  | 10     | +          | +    | C        |
| mAID5 34   | 3-23   | 3-22 | 3  | 1  | KDVQVVTMIVVAPFQH  | 15     | 3-20  | 2  | QQYGSSPPYT  | 10     | +          | -    | -        |
| mAID5 39   | 1-3    | 2-21 | 2  | 6  | APYCGGDCLGYYYGMDV | 17     | 2-28  | 3  | MQALQTPFT   | 9      | -          | +    | -        |
| mAID5 42   | 4-4    | 1-26 | 2  | 4  | GGEKSGSYPPYFDY    | 14     | 1-9   | 4  | QQLNSYPLT   | 9      | -          | -    | -        |
| mAID5 47   | 4-61   | 2-15 | 3  | 6  | VTATGYYYGMDV      | 12     | 3-11  | 3  | QQRSNWPL    | 8      | +          | +    | N+C      |
| mAID5 01   | 4-59   | 3-22 | 2  | 4  | ANYDSSPLGPFYD     | 14     |       |    |             |        |            |      |          |
| mAID5 03   | 3-9    | /    | /  | 6  | DLAPALQQGGGMDV    | 14     |       |    |             |        |            |      |          |
| mAID5 06   | 3-7    | 5-5  | 1  | 6  | ESWIQLDDNYYYYGMDV | 17     |       |    |             |        |            |      |          |
| mAID5 14   | 1-2    | 3-10 | 1  | 6  | GVLWFGESDYGGMDV   | 16     |       |    |             |        |            |      |          |
| mAID5 45   | 1-8    | 3-22 | 2  | 4  | GGVSSGYHTDY       | 11     |       |    |             |        |            |      |          |
| mAID5 46   | 3-23   | 3-22 | 2  | 5  | DNYYDSSGYRDDLVDP  | 17     |       |    |             |        |            |      |          |
|            | VH     | D    | RF | JH | CDR3 (aa)         | Length | Vλ    | Jλ | CDR3 (aa)   | Length | Poly       | Hep2 | Staining |
| mAID5 02 # | 1-69   | 3-3  | 2  | 5  | DSDENYDFWSGTFDP   | 15     | 1-44  | 2  | AAWDDSLNGVV | 11     |            |      |          |
| mAID5 28   | 4-39   | 6-6  | 2  | 6  | DSSSSGLYYYYYGGMDV | 17     | 1-51  | 2  | GTWSSLSAVV  | 11     | -          | -    | -        |
| mAID5 31   | 3-7    | 6-19 | 1  | 5  | DRRVGQWLVDYD      | 12     | 1-40  | 2  | QSYDSSLGGSV | 11     | -          | -    | -        |
| mAID5 33   | 4-34   | 3-22 | 2  | 4  | GRGYDSSGYDLDY     | 15     |       |    | out         |        |            |      |          |
| mAID5 05   |        |      |    |    |                   |        | 2-23  | 1  | CSYAGSSTYV  | 10     |            |      |          |
| mAID5 07   |        |      |    |    |                   |        | 2-14  | 3  | SSYTSSSTPWV | 11     |            |      |          |
| mAID5 12   |        |      |    |    |                   |        | 1-47  | 3  | AAWDDSLSGWV | 11     |            |      |          |
| mAID5 20   |        |      |    |    |                   |        | 2-14  | 2  | SSYTSSSTLV  | 10     |            |      |          |

RF, reading frame; #, antibody failed to be expressed

-, non-reactive; +, reactive

c, diffuse cytoplasmic staining; A, actin staining; G, Golgi staining; M, mitochondria staining; MS, mitotic spindle staining; N, nuclear staining; F, cytoplasmic fibers



**Table S12.** Repertoire and reactivity of antibodies from new emigrant B cells of AID-deficient patient 6.

| Ig          | HEAVY |      |    |    |                             |        | LIGHT |    |               |        | REACTIVITY |      |          |
|-------------|-------|------|----|----|-----------------------------|--------|-------|----|---------------|--------|------------|------|----------|
|             | VH    | D    | RF | JH | CDR3 (aa)                   | Length | Vκ    | Jκ | CDR3 (aa)     | Length | Poly       | Hep2 | Staining |
| neAID6 01   | 3-15  | 3-9  | 2  | 4  | DWGDYDILTGYQYYFDY           | 17     | 1-17  | 2  | LQHNSYPRT     | 9      | +          | +    | c        |
| neAID6 07   | 4-4   | 2-15 | 2  | 6  | DEGYCSGGSCYINDYYYYGMDV      | 22     | 1-39  | 1  | QQSYSTPWT     | 9      | -          | -    | -        |
| neAID6 11   | 3-73  | 3-16 | 1  | 6  | RGRLGELSQUALYGMVDV          | 16     | 1-33  | 3  | QQYDNLPT      | 9      | +          | +    | c        |
| neAID6 20   | 3-7   | 6-6  | 3  | 5  | DAESIAARYWFDP               | 13     | 3-11  | 1  | QQRSNWPPPT    | 9      | -          | -    | -        |
| neAID6 22 # | 1-18  | 2-2  | 2  | 5  | GLYCSSTSCYIWNYNWFDP         | 19     | 2-28  | 4  | MQALQTPPT     | 9      |            |      |          |
| neAID6 23   | 3-23  | 5-5  | 1  | 4  | GTRQLPYPWYFDY               | 13     | 3-20  | 2  | QQYGSSPYT     | 9      | -          | -    | -        |
| neAID6 24   | 3-23  | 2-2  | 2  | 6  | ACSTSCPNNYYGMDV             | 15     | 1-13  | 5  | QQFNSTPYT     | 8      | +          | +    | c        |
| neAID6 27   | 3-30  | 1-1  | 1  | 4  | DSGELTVQLELYAIDC            | 16     | 3-11  | 2  | QQRSNWPPYT    | 10     | +          | +    | -        |
| neAID6 28   | 3-15  | 3-22 | 2  | 4  | EHYDSSGYVDY                 | 12     | 3-11  | 3  | QQRSNWPPGGLFT | 13     | -          | -    | -        |
| neAID6 35   | 3-21  | /    | /  | 4  | GADI                        | 4      | 1-33  | 4  | QQYDNLPLT     | 9      | -          | -    | -        |
| neAID6 40   | 4-59  | 6-13 | 3  | 4  | EGVAAAGLGY                  | 10     | 3-20  | 2  | QQYGSSLYT     | 9      | -          | +    | -        |
| neAID6 42 # | 1-18  | 3-3  | 3  | 6  | SDWWIFGLPDRMDV              | 14     | 4-1   | 4  | QQYYSTPLT     | 9      |            |      |          |
| neAID6 45   | 3-33  | 3-10 | 2  | 4  | DAPGYGSGIDY                 | 12     | 1-6   | 2  | LQDYNPYT      | 9      | -          | -    | -        |
| neAID6 46   | 3-21  | 6-19 | 2  | 6  | VFRVSSGWYSYYGMDV            | 17     | 3-20  | 4  | QQYGSSPLT     | 10     | +2         | +2   | F        |
| neAID6 47   | 5-51  | 6-19 | 3  | 1  | HSGIAVAERLMVYFQH            | 16     | 3-15  | 2  | QQYNNWPPYT    | 10     | -          | -    | -        |
| neAID6 02   |       |      |    |    |                             |        | 3-20  | 1  | QQYGSSAWT     | 9      |            |      |          |
| neAID6 14   |       |      |    |    |                             |        | 2-28  | 2  | MQALQTPYT     | 9      |            |      |          |
| neAID6 18   |       |      |    |    |                             |        | 1-5   | 1  | QQYNSYFWT     | 9      |            |      |          |
| neAID6 32   |       |      |    |    |                             |        | 3-11  | 5  | QQRSNWPIT     | 9      |            |      |          |
| neAID6 39   |       |      |    |    |                             |        | 3-15  | 1  | QQYNNWPKT     | 9      |            |      |          |
| neAID6 43   |       |      |    |    |                             |        | 3-20  | 2  | QQYGSSPLT     | 9      |            |      |          |
|             | VH    | D    | RF | JH | CDR3 (aa)                   | Length | Vλ    | Jλ | CDR3 (aa)     | Length | Poly       | Hep2 | Staining |
| neAID6 08 # | 1-46  | 3-10 | 3  | 3  | VGITMVQGVGTGGAFDI           | 16     | 1-44  | 3  | AAWDDSLNGWV   | 11     |            |      |          |
| neAID6 12   | 3-33  | /    | /  | 3  | DHNEGYPKSAFDI               | 13     | 1-51  | 2  | GTWDSLSAVV    | 11     | -          | -    | -        |
| neAID6 30   | 4-59  | 6-6  | 3  | 6  | DLRSIAAPSYGMDV              | 14     | 3-1   | 1  | QAWDSSTAYV    | 10     | -          | -    | -        |
| neAID6 48   | 3-23  | 1-26 | 2  | 4  | VGGGIGGSYRRGYFDY            | 16     | 2-14  | 1  | SSYTSSSTLGV   | 11     | -          | -    | -        |
| neAID6 06   |       |      |    |    |                             |        | 2-14  | 3  | SSYTSSSTWV    | 10     |            |      |          |
| neAID6 36   |       |      |    |    |                             |        | 1-51  | 1  | GTWDSLSAPSIV  | 13     |            |      |          |
| neAID6 38   |       |      |    |    |                             |        | 1-51  | 1  | GTWDSLSAFIV   | 12     |            |      |          |
| neAID6 44   |       |      |    |    |                             |        | 2-14  | 3  | SSYTSSSTWV    | 10     |            |      |          |
|             | VH    | D    | RF | JH | CDR3 (aa)                   | Length | V     | J  | CDR3 (aa)     | Length | Poly       | Hep2 | Staining |
| neAID6 05   | 3-66  | 2-15 | 2  | 5  | ALGCSGGSCYSEQWLANGGGDSNWFDP | 27     |       |    |               |        |            |      |          |
|             |       | 2-21 | 2  |    |                             |        |       |    |               |        |            |      |          |
| neAID6 09   | 3-7   | 6-19 | 1  | 4  | DSEQWLGDY                   | 9      |       |    |               |        |            |      |          |
| neAID6 13   | 4-31  | 3-10 | 1  | 5  | DCWFRELSANWFDP              | 14     |       |    |               |        |            |      |          |
| neAID6 16   | 1-46  | 4-17 | 2  | 4  | IPDYRDYVLVDY                | 12     |       |    |               |        |            |      |          |
| neAID6 33   | 3-23  | 3-22 | 3  | 4  | VTGGGTMDLLNIRSTDDY          | 19     |       |    |               |        |            |      |          |
| neAID6 34   | 3-15  | 1-26 | 2  | 4  | VGGSY                       | 6      |       |    |               |        |            |      |          |
| neAID6 41   | 3-23  | 4-17 | 2  | 4  | DPYGDYIFDY                  | 10     |       |    |               |        |            |      |          |

RF, reading frame; #, antibody failed to be expressed

-, non-reactive; +, reactive; +2, highly reactive

c, diffuse cytoplasmic staining; A, actin staining; G, Golgi staining; M, mitochondria staining; MS, mitotic spindle staining; N, nuclear staining; F, cytoplasmic fibers

**Table S13.** Repertoire and reactivity of antibodies from mature naïve B cells of AID-deficient patient 6.

| Ig       | HEAVY |      |    |    |                          | LIGHT  |       |    |                |        | REACTIVITY |      |          |
|----------|-------|------|----|----|--------------------------|--------|-------|----|----------------|--------|------------|------|----------|
|          | VH    | D    | RF | JH | CDR3 (aa)                | Length | Vκ    | Jκ | CDR3 (aa)      | Length | Poly       | Hep2 | Staining |
| mAID6 01 | 1-2   | 5-12 | 2  | 4  | PLYSGYGSFDY              | 11     | 3D-20 | 1  | QQYGSSQWT      | 9      | -          | -    | -        |
| mAID6 04 | 3-21  | /    | /  | 6  | VKVTHGDDYYYYYGMVDV       | 17     | 2-28  | 3  | MQALQTPRT      | 9      | -          | +    | N        |
| mAID6 05 | 4-59  | 3-10 | 2  | 4  | DGSGSL                   | 5      | 1-33  | 5  | QQYDNLPIIT     | 9      | -          | -    | -        |
| mAID6 09 | 3-11  | 3-3  | 3  | 5  | DQRERATIFGVVIAPNHQGNWFDP | 24     | 1-39  | 1  | QQSYSTPRT      | 9      | +2         | +2   | N        |
| mAID6 10 | 3-11  | 3-16 | 2  | 4  | TFYDYVWGSGLDY            | 12     | 1-39  | 1  | QQSYSTPRT      | 9      | -          | +    | -        |
| mAID6 11 | 4-59  | 2-15 | 2  | 6  | DYFYCSGGSCYPYGMVDV       | 18     | 3-11  | 1  | QQRSGWT        | 7      | -          | +    | -        |
| mAID6 20 | 4-31  | 5-24 | 3  | 4  | VFDREMATGGGDY            | 14     | 3-20  | 3  | QQYGSSPLFT     | 10     | -          | +    | -        |
| mAID6 22 | 3-7   | 2-2  | 3  | 6  | DSSQVVPATYYYYYGMVDV      | 19     | 3-15  | 2  | QQYNNWPHLSRLYT | 14     | +          | +    | -        |
| mAID6 24 | 4-4   | 5-5  | 3  | 6  | DNVDTAMVGYYYGMDV         | 17     | 3-11  | 4  | QQRSNWPLT      | 9      | -          | +    | -        |
| mAID6 27 | 3-23  | 6-19 | 2  | 5  | SSA                      | 3      | 1-5   | 1  | QQYNSYLWT      | 9      | -          | -    | -        |
| mAID6 31 | 4-59  | 4-17 | 2  | 6  | DATQPSNDYGDYGEIYYGMDV    | 22     | 1-39  | 1  | QQSYSTRWT      | 9      | -          | -    | -        |
| mAID6 43 | 3-49  | 6-19 | 1  | 4  | EEGQWLVPDY               | 10     | 3-20  | 3  | QQYGSSPFT      | 9      | -          | +    | -        |
| mAID6 54 | 4-34  | 6-6  | 2  | 4  | VGYSSSGGDY               | 11     | 1-13  | 2  | QQFNSYPRT      | 9      | -          | +    | -        |
| mAID6 61 | 3-23  | 3-22 | 2  | 3  | DLLPKYYYDSSGYTDAFDI      | 20     | 4-1   | 1  | QQYYSTRT       | 8      | +          | -    | -        |
| mAID6 63 | 3-23  | /    | /  | 4  | VPSSFAYYFDY              | 12     | 3-20  | 1  | QQYGSSPVT      | 9      | -          | -    | -        |
| mAID6 64 | 3-7   | 2-2  | 3  | 4  | SVVVPAAQFDY              | 11     | 3-20  | 2  | QQYGSSPLYT     | 10     | -          | -    | -        |
| mAID6 82 | 3-48  | 3-22 | 3  | 4  | DLVVVTGY                 | 8      | 1-17  | 1  | LQHNSYPWT      | 9      | -          | +    | -        |
| mAID6 62 |       |      |    |    |                          |        | 3-11  | 1  | QQRNSVT        | 8      |            |      |          |
|          | VH    | D    | RF | JH | CDR3 (aa)                | Length | Vλ    | Jλ | CDR3 (aa)      | Length | Poly       | Hep2 | Staining |
| mAID6 15 | 3-7   | 4-17 | 2  | 3  | DGYGDYEYYAFDI            | 13     | 2-14  | 1  | SSYTSSSTNYV    | 11     | -          | -    | -        |
| mAID6 16 | 3-30  | 4-4  | 2  | 6  | DLYSNYVDYYYGMDV          | 16     | 2-23  | 2  | CSYAGSSTFV     | 10     | -          | -    | -        |
|          | VH    | D    | RF | JH | CDR3 (aa)                | Length | V     | J  | CDR3 (aa)      | Length | Poly       | Hep2 | Staining |
| mAID6 59 | 3-33  | 6-19 | 3  | 4  | DRSRPSIAVAGTLDY          | 15     |       |    |                |        |            |      |          |

RF, reading frame; #, antibody failed to be expressed

-, non-reactive; +, reactive; +2, highly reactive

c, diffuse cytoplasmic staining; A, actin staining; G, Golgi staining; M, mitochondria staining; MS, mitotic spindle staining; N, nuclear staining; F, cytoplasmic fibers

**Table S14.** Repertoire of antibodies from new emigrant B cells of AID-deficient patient 10.

| Ig         | HEAVY  |      |    |    |                         |        | LIGHT |    |              |        |           |        |   |   |           |
|------------|--------|------|----|----|-------------------------|--------|-------|----|--------------|--------|-----------|--------|---|---|-----------|
|            | VH     | D    | RF | JH | CDR3 (aa)               | Length | Vκ    | Jκ | CDR3 (aa)    | Length |           |        |   |   |           |
| neAID10 01 | 1-18   | 2-15 | 2  | 5  | VGCSGGSCYGGPPLGNWFDP    | 20     | 1-39  | 2  | QQSYSTPPT    | 9      |           |        |   |   |           |
| neAID10 02 | 3-23   | 4-23 | 2  | 3  | VQGYGGNSDDAFDI          | 14     | 1-5   | 1  | QQYNSYSGT    | 9      |           |        |   |   |           |
| neAID10 03 | 3-9    | 6-19 | 1  | 3  | DRRQWLPGGAFDI           | 13     | 1-39  | 2  | QQSYSTPYT    | 9      |           |        |   |   |           |
| neAID10 04 | 1-18   | 3-16 | 3  | 4  | DLTLFWLPDEDRNNMITLGY    | 21     | 1-39  | 4  | QQSYSTLLT    | 9      |           |        |   |   |           |
| neAID10 05 | 3-30-3 | 3-10 | 2  | 4  | ADHGSRSYFYDY            | 12     | 1-39  | 3  | QQSYSTPPFT   | 10     |           |        |   |   |           |
| neAID10 10 | 1-3    | /    | /  | 4  | GAPETALDY               | 9      | 3-20  | 1  | QQYGSSPWT    | 9      |           |        |   |   |           |
| neAID10 12 | 3-15   | 6-13 | 2  | 4  | DTGYSSSWYLGGEFDY        | 16     | 3-20  | 4  | QQYGSSPLT    | 9      |           |        |   |   |           |
| neAID10 17 | 3-30-3 | 6-19 | 1  | 6  | IRQQWLGYYYYGMDV         | 15     | 1-33  | 5  | QQYDNLPIIT   | 9      |           |        |   |   |           |
| neAID10 22 | 3-11   | 1-26 | 3  | 6  | DEGDTEGDYNYYYMDV        | 17     | 1-39  | 2  | QQSYSTPLYT   | 10     |           |        |   |   |           |
| neAID10 25 | 3-48   | /    | /  | 4  | DPVEEGGRD               | 9      | 1-5   | 1  | QQYNSYLRT    | 9      |           |        |   |   |           |
| neAID10 28 | 4-39   | 6-13 | 3  | 4  | IGAAAGIIDY              | 10     | 4-1   | 4  | QQYYSTPLT    | 9      |           |        |   |   |           |
| neAID10 29 | 3-7    | 3-10 | 3  | 4  | DLTSMVQGVDPDY           | 12     | 1-17  | 1  | LQHNSYPWT    | 9      |           |        |   |   |           |
| neAID10 30 | 3-23   | /    | /  | 4  | DALAGK                  | 6      | 1-16  | 2  | QQYNSYPYT    | 9      |           |        |   |   |           |
| neAID10 31 | 3-66   | /    | /  | 4  | DLNDYGDY                | 8      | 2-30  | 2  | MQGTLGGT     | 8      |           |        |   |   |           |
| neAID10 35 | 4-34   | 6-6  | 2  | 4  | LGFTCPSSSESDFDY         | 16     | 2-28  | 2  | MQALQTPRT    | 9      |           |        |   |   |           |
| neAID10 06 |        |      |    |    |                         |        | 3-20  | 2  | QQYGSSPYT    | 9      |           |        |   |   |           |
| neAID10 14 |        |      |    |    |                         |        | 3-20  | 5  | QQYGSSPPIT   | 10     |           |        |   |   |           |
| neAID10 34 |        |      |    |    |                         |        | 3-20  | 1  | QQYGSSRT     | 8      |           |        |   |   |           |
| neAID10 40 |        |      |    |    |                         |        | 3-20  | 2  | QQYGSSPRT    | 9      |           |        |   |   |           |
| neAID10 43 |        |      |    |    |                         |        | 1-39  | 2  | QQSYSTPPYT   | 10     |           |        |   |   |           |
| neAID10 46 |        |      |    |    |                         |        | 3-20  | 5  | QQYGSSPIT    | 9      |           |        |   |   |           |
|            |        |      |    |    |                         |        |       |    |              |        |           |        |   |   |           |
|            | VH     | D    | RF | JH | CDR3 (aa)               | Length | Vλ    | Jλ | CDR3 (aa)    | Length |           |        |   |   |           |
| neAID10 09 | 4-34   | 2-2  | 2  | 4  | EGCSSTSCVDY             | 11     | 1-51  | 2  | GTWDSLSAGRV  | 12     |           |        |   |   |           |
| neAID10 11 | 1-24   | 3-10 | 3  | 4  | PGITMVQGVIIKDAPPAYDAFDI | 23     | 1-44  | 1  | AAWDDSLNGLYV | 12     |           |        |   |   |           |
| neAID10 15 | 4-39   | /    | /  | 2  | LRIYHKWYFDL             | 11     | 1-47  | 2  | AAWDDSLSGPEV | 12     |           |        |   |   |           |
| neAID10 16 | 3-15   | 2-15 | 2  | 6  | DGCSGGSCYPLDY           | 13     | 6-57  | 2  | QSYDSSNQV    | 9      |           |        |   |   |           |
| neAID10 18 | 3-30   | 1-26 | 3  | 3  | EIVGATIREMGDAFDI        | 16     | 1-36  | 2  | AAWDDSLNGVV  | 11     |           |        |   |   |           |
| neAID10 21 | 3-15   | 2-2  | 3  | 5  | DGIVVPAAVGYNWFDP        | 17     | 1-51  | 2  | GTWDSLSVWV   | 11     |           |        |   |   |           |
| neAID10 23 | 3-30-3 | 2-21 | 2  | 4  | DHAQDCGGDCLYLDY         | 15     | 3-10  | 2  | YSTDSSGNHRV  | 11     |           |        |   |   |           |
| neAID10 24 | 3-30   | 1-26 | 1  | 3  | DQWELQGAFDI             | 11     | 2-14  | 2  | SSYTSSSHVV   | 10     |           |        |   |   |           |
| neAID10 37 | 5-51   | 3-10 | 2  | 2  | LRDGSYSYYPHWYFDL        | 17     | 1-44  | 2  | AAWDDSLNGPV  | 11     |           |        |   |   |           |
| neAID10 06 |        |      |    |    |                         |        | 1-51  | 1  | GTWDSLSAGV   | 11     |           |        |   |   |           |
| neAID10 26 |        |      |    |    |                         |        | 7-46  | 2  | LLSYSGAREV   | 10     |           |        |   |   |           |
| neAID10 38 |        |      |    |    |                         |        | 2-14  | 2  | SSYTSSSTLGV  | 11     |           |        |   |   |           |
| neAID10 39 |        |      |    |    |                         |        | 1-51  | 2  | GTWDSLSAWV   | 11     |           |        |   |   |           |
| neAID10 45 |        |      |    |    |                         |        | 3-21  | 2  | QVWDSSSDL    | 9      |           |        |   |   |           |
| neAID10 47 |        |      |    |    |                         |        | 1-40  | 2  | QSYDSSLSGHVV | 11     |           |        |   |   |           |
| neAID10 48 |        |      |    |    |                         |        | 2-14  | 2  | SSYTSSSTRV   | 10     |           |        |   |   |           |
|            |        |      |    |    |                         |        |       |    |              |        |           |        |   |   |           |
|            |        |      |    |    |                         |        | VH    | D  | RF           | JH     | CDR3 (aa) | Length | V | J | CDR3 (aa) |
| neAID10 07 | 1-3    | 5-12 | 2  | 3  | DRDWVRGYSGYDRDAFDI      | 18     |       |    |              |        |           |        |   |   |           |
| neAID10 08 | 3-15   | 1-26 | 3  | 4  | DPLSIVGAVEEDLADY        | 16     |       |    |              |        |           |        |   |   |           |
| neAID10 27 | 3-30-3 | /    | /  | 4  | SSGPFDY                 | 7      |       |    |              |        |           |        |   |   |           |
| neAID10 32 | 4-4    | 2-15 | 2  | 4  | THLCSGGSCQRGFDY         | 15     |       |    |              |        |           |        |   |   |           |
| neAID10 33 | 3-23   | 6-13 | 3  | 2  | DRRIASAGTLPNWFYFDL      | 17     |       |    |              |        |           |        |   |   |           |

RF, reading frame

**Table S15.** Repertoire of antibodies from mature naïve B cells of AID-deficient patient 10.

| Ig         | HEAVY  |      |    |    |                         |        |
|------------|--------|------|----|----|-------------------------|--------|
|            | VH     | D    | RF | JH | CDR3 (aa)               | Length |
| mAID10 H07 | 4-30-2 | 2-15 | 3  | 6  | VAVVAATGGYMDV           | 13     |
| mAID10 H08 | 4-59   | /    | /  | 5  | GFDP                    | 4      |
| mAID10 H09 | 3-30-3 | 1-26 | 2  | 4  | SHSKYSGSYQPLDY          | 14     |
| mAID10 H10 | 3-13   | 3-9  | 2  | 6  | SRSISSYYDILTGYSDDYYGMDV | 24     |
| mAID10 H11 | 4-34   | 3-16 | 2  | 4  | GLPYDYVWGSPTGGPED       | 17     |
| mAID10 H12 | 3-30-3 | 2-15 | 3  | 6  | DFGRSSLVAAAKYYYYGMDV    | 20     |
| mAID10 H13 | 3-21   | 6-6  | 2  | 3  | VGSSPFPSQIFAFDI         | 15     |
| mAID10 H15 | 3-30   | 7-27 | 2  | 4  | GDWGLVDY                | 8      |
| mAID10 H16 | 1-18   | 1-26 | 3  | 4  | EIHHLVGATPWDY           | 13     |
| mAID10 H17 | 4-59   | 3-16 | 2  | 4  | VWGDPGNFFDY             | 11     |
| mAID10 H18 | 4-31   | 4-17 | 2  | 4  | LREDYGDYVYFDY           | 14     |
| mAID10 H19 | 3-33   | 3-9  | 2  | 4  | WFGDILTYIDY             | 12     |
| mAID10 H21 | 3-30   | 2-15 | 3  | 4  | GVSVVVAASPLIDY          | 16     |
| mAID10 H22 | 3-21   | 1-26 | 3  | 4  | GVGATFFDY               | 9      |
| mAID10 H23 | 4-30-4 | 3-9  | 2  | 5  | GFDLHWFDY               | 10     |
| mAID10 H24 | 3-73   | 6-19 | 3  | 3  | QKKEVAVATGAFDI          | 15     |
| mAID10 H25 | 4-59   | 6-13 | 2  | 4  | HSLSSFDY                | 9      |
| mAID10 H26 | 4-31   | /    | /  | 4  | DGDPTTYFDY              | 13     |
| mAID10 H27 | 4-4    | /    | /  | 4  | SNPASPLHFDY             | 12     |
| mAID10 H28 | 3-21   | /    | /  | 3  | DQTALGFYQNDAFDI         | 15     |
| mAID10 H29 | 4-34   | 1-26 | 3  | 4  | KPRKWVGATMTTYPYDY       | 17     |
| mAID10 H30 | 3-30   | 3-22 | 2  | 4  | GHPHYDSSAAFY            | 14     |
| mAID10 H31 | 4-39   | 4-17 | 3  | 2  | LKTTRLWYFDL             | 11     |
| mAID10 H32 | 3-9    | /    | /  | 2  | DSGSRNWYFDL             | 11     |
| mAID10 H33 | 4-b    | 2-15 | 2  | 4  | AGHCSSGSCYSFDY          | 14     |
| mAID10 H34 | 3-33   | 6-19 | 3  | 6  | DIQAKVAGGEAGMDV         | 15     |
| mAID10 H36 | 3-30   | 1-26 | 2  | 4  | VHSGSWG                 | 7      |
| mAID10 H37 | 4-39   | /    | /  | 3  | QYRVGAFDI               | 9      |
| mAID10 H39 | 3-30-3 | 4-4  | 2  | 4  | GDYRRIHGPPDY            | 12     |
| mAID10 H42 | 1-2    | 4-17 | 3  | 5  | TVTTLGFDP               | 9      |

RF, reading frame

**Table S16.** Repertoire of antibodies from new emigrant B cells of healthy donor HD11.

| Ig        | HEAVY |      |    |    |                             |        | LIGHT |    |             |        |  |
|-----------|-------|------|----|----|-----------------------------|--------|-------|----|-------------|--------|--|
|           | VH    | D    | RF | JH | CDR3 (aa)                   | Length | Vκ    | Jκ | CDR3 (aa)   | Length |  |
| neHD11 02 | 3-48  | 6-13 | 1  | 3  | SQQQVFYAFDI                 | 11     | 1-39  | 1  | QQSYSTPGT   | 9      |  |
| neHD11 03 | 3-23  | 2-2  | 3  | 5  | APLGSFVVDKWFDP              | 15     | 3-20  | 1  | QQYGSSPWT   | 9      |  |
| neHD11 04 | 3-23  | 6-13 | 2  | 4  | DSSSWYDIVAGSFYD             | 15     | 1-17  | 2  | LQHNSYPYT   | 9      |  |
| neHD11 15 | 3-11  | 3-22 | 2  | 4  | APDDSSGYSLDY                | 12     | 3-20  | 3  | QQYGSSPPFG  | 10     |  |
| neHD11 20 | 4-59  | 1-1  | 1  | 4  | TSELERRLPFDY                | 12     | 4-1   | 1  | QQYYSTPRT   | 9      |  |
| neHD11 21 | 3-23  | 6-13 | 3  | 2  | IIRPRPQQLAAAGNWFYDL         | 19     | 3-15  | 4  | QQYNNWPLT   | 9      |  |
| neHD11 26 | 1-69  | 2-8  | 2  | 6  | DFWGTGGEYWTPVSINRMDV        | 20     | 2-24  | 1  | MQATQFPRT   | 9      |  |
| neHD11 33 | 3-15  | 5-5  | 2  | 6  | DLARTYSYGSGGYGMDV           | 19     | 3-20  | 3  | QQYGSSPET   | 9      |  |
| neHD11 34 | 4-39  | 5-24 | 3  | 4  | HVPEMATHGEYFDY              | 15     | 1-8   | 1  | QQYYSYPQT   | 9      |  |
| neHD11 39 | 1-18  | 2-2  | 2  | 6  | AVKTTALRYCSSTSCLWGPAGYGMDV  | 26     | 2-28  | 1  | MQALQTPQT   | 9      |  |
| neHD11 40 | 4-34  | 3-3  | 1  | 4  | GRSRPSLEWGTDFDY             | 15     | 4-1   | 4  | QQYYSTPPLT  | 10     |  |
| neHD11 43 | 1-69  | 3-16 | 3  | 5  | GGEDDSGGDWFPD               | 13     | 3-15  | 1  | QQYNNWPLT   | 9      |  |
| neHD11 47 | 1-46  | 4-4  | 2  | 6  | VRSYYSNPHYYYYGMDV           | 18     | 1-9   | 4  | QQLNSYPSLT  | 10     |  |
| neHD11 07 |       |      |    |    |                             |        | 1-5   | 4  | QQYNSYPLT   | 9      |  |
| neHD11 08 |       |      |    |    |                             |        | 3-11  | 2  | QQRSNWPYT   | 9      |  |
| neHD11 09 |       |      |    |    |                             |        | 1-33  | 3  | QQYDNLFT    | 9      |  |
| neHD11 10 |       |      |    |    |                             |        | 3-20  | 1  | QQYGSSSWT   | 9      |  |
| neHD11 11 |       |      |    |    |                             |        | 4-1   | 3  | QQYYSTPPT   | 9      |  |
| neHD11 12 |       |      |    |    |                             |        | 1-39  | 4  | QQSYSTPRLT  | 10     |  |
| neHD11 14 |       |      |    |    |                             |        | 1-39  | 4  | QQSYSTPLT   | 9      |  |
| neHD11 22 |       |      |    |    |                             |        | 3-15  | 3  | QQYNNWLFT   | 9      |  |
| neHD11 25 |       |      |    |    |                             |        | 2-28  | 1  | MQALQTPWT   | 9      |  |
| neHD11 29 |       |      |    |    |                             |        | 1-39  | 2  | QQSYSTPRT   | 9      |  |
|           | VH    | D    | RF | JH | CDR3 (aa)                   | Length | Vλ    | Jλ | CDR3 (aa)   | Length |  |
| neHD11 03 |       |      |    |    | see kappa                   |        | 3-1   | 2  | QAWDSSAVV   | 9      |  |
| neHD11 20 |       |      |    |    | see kappa                   |        | 2-23  | 1  | CSYAGSSTHYV | 11     |  |
| neHD11 23 | 3-21  | /    | /  | 5  | LRGQVGDNWFDP                | 12     | 1-44  | 3  | AAWDDSLNGWV | 11     |  |
| neHD11 27 | 3-9   | 6-13 | 3  | 5  | DIAAAGGRGSFDP               | 13     | 2-23  | 1  | CSYAGSSTFYV | 11     |  |
| neHD11 28 | 5-51  | /    | /  | 5  | RGTQRGWFPD                  | 10     | 2-8   | 1  | SSYAGSNNYV  | 10     |  |
| neHD11 30 | 4-39  | 5-24 | 3  | 4  | VPPEMATIRY                  | 10     | 2-14  | 2  | SSYTSSSTLVV | 11     |  |
| neHD11 35 | 3-33  | /    | /  | 5  | GARGGQVDWFDP                | 12     | 3-21  | 2  | QVWDSSSDQVV | 11     |  |
| neHD11 44 | 4-34  | /    | /  | 5  | GVSNGPNSTWFDP               | 13     | 3-1   | 3  | QAWDSSTWV   | 9      |  |
| neHD11 41 |       |      |    |    |                             |        | 3-1   | 1  | QAWDSSTPYV  | 10     |  |
|           | VH    | D    | RF | JH | CDR3 (aa)                   | Length | V     | J  | CDR3 (aa)   | Length |  |
| neHD11 24 | 3-11  | 3-16 | 2  | 4  | APGSSYYFDY                  | 10     |       |    |             |        |  |
| neHD11 36 | 3-21  | 5-5  | 2  | 6  | DRYSYGPDYYYYGMDV            | 16     |       |    |             |        |  |
| neHD11 38 | 4-34  | 3-22 | 2  | 6  | GFFNGHDGWYYYDSSGYYYYYYGGMDV | 26     |       |    |             |        |  |
| neHD11 45 | 3-49  | 2-8  | 3  | 4  | MLSAGY                      | 6      |       |    |             |        |  |
| neHD11 46 | 1-18  | 5-24 | 3  | 5  | VEMATIRSNWFDP               | 13     |       |    |             |        |  |
| neHD11 48 | 1-8   | 5-5  | 2  | 4  | GRTYSYGQNDY                 | 11     |       |    |             |        |  |

RF, reading frame

**Table S17.** Repertoire of antibodies from mature naive B cells of healthy donor HD11.

| Ig        | HEAVY |      |    |    |                     |        | LIGHT |    |              |        |  |
|-----------|-------|------|----|----|---------------------|--------|-------|----|--------------|--------|--|
|           | VH    | D    | RF | JH | CDR3 (aa)           | Length | Vκ    | Jκ | CDR3 (aa)    | Length |  |
| mHD11 13  | 4-59  | 4-17 | 2  | 6  | DYDYGDYYGMDV        | 12     | 1-39  | 2  | QQSYSTPPYT   | 10     |  |
| mHD11 14  | 3-21  | 6-13 | 3  | 4  | DQSIAAAGGANFDY      | 14     | 3-15  | 1  | QQYNNWPPWT   | 10     |  |
| mHD11 15  | 1-18  | 4-17 | 2  | 6  | WHYGDYFYYYYYGMDV    | 16     | 3-20  | 1  | QQYGSSPPS    | 9      |  |
| mHD11 16  | 1-2   | 3-10 | 1  | 5  | EGFGEPYTTGWFDP      | 15     | 3-15  | 1  | QQYNNWPPERT  | 11     |  |
| mHD11 18  | 3-23  | 6-6  | 3  | 5  | VNIAARVAWFDP        | 12     | 1-27  | 4  | QKYNASFT     | 9      |  |
| mHD11 26  | 4-34  | /    | /  | 4  | GYLDYYFDY           | 9      | 1-39  | 1  | QQSYSTPRT    | 9      |  |
| mHD11 31  | 4-61  | 3-3  | 1  | 5  | GGFLEWLSWFDP        | 12     | 1-27  | 3  | QKYNAPPGIT   | 11     |  |
| mHD11 34  | 3-33  | 3-22 | 2  | 4  | DFSYDSSGPFDP        | 12     | 1-NL1 | 4  | QQYYSTPLT    | 9      |  |
| mHD11 35  | 3-23  | /    | /  | 6  | YPGYYYYYGMDV        | 12     | 1-27  | 1  | QKYNASAPQT   | 9      |  |
| mHD11 39  | 3-7   | 1-26 | 2  | 4  | DRPGGSLDY           | 10     | 1-NL1 | 4  | QQYYSTLGT    | 9      |  |
| mHD11 46  | 1-69  | 3-22 | 2  | 4  | NNYDSSGYFDPPPTYFDY  | 18     | 1-5   | 1  | QQYNSYSPWT   | 10     |  |
| mHD11 305 | 4-61  | 6-19 | 2  | 4  | AQYSSGWGAYMDY       | 13     | 1-33  | 4  | QQYDNLFPFT   | 9      |  |
| mHD11 306 | 3-33  | 3-22 | 2  | 4  | DRGYYYDSSGYFFYY     | 16     | 1-16  | 4  | QQYNSYPLT    | 9      |  |
| mHD11 312 | 3-21  | 2-2  | 3  | 4  | DIVVVPAADFDP        | 12     | 1-39  | 4  | QQSYSTPRS    | 9      |  |
| mHD11 314 | 3-15  | 2-2  | 2  | 4  | DRYCSSTSCSPMRVPDY   | 17     | 1-39  | 2  | QQSYSTPRT    | 9      |  |
| mHD11 316 | 1-2   | 2-15 | 3  | 4  | EVVVVAATPTS         | 12     | 2-40  | 1  | MQRIFPWT     | 9      |  |
| mHD11 328 | 1-46  | 2-15 | 2  | 5  | VLGSGGSCEFDP        | 12     | 3-11  | 4  | QQRSNWPLT    | 10     |  |
| mHD11 333 | 3-23  | 2-15 | 3  | 4  | STLVVVAATLRY        | 12     | 1-33  | 1  | QQYDNLPPG    | 9      |  |
| mHD11 344 | 3-53  | 1-26 | 3  | 4  | VGATPPFH            | 8      | 1-9   | 4  | QQLNSYHALT   | 10     |  |
|           | VH    | D    | RF | JH | CDR3 (aa)           | Length | Vλ    | Jλ | CDR3 (aa)    | Length |  |
| mHD11 305 |       |      |    |    | see kappa           |        | 3-1   | 2  | QAWDSSVV     | 8      |  |
| mHD11 309 | 1-8   | 6-6  | 2  | 4  | GSYSSSSLASY         | 11     | 3-1   | 3  | QAWDSSTWV    | 9      |  |
| mHD11 311 | 3-23  | 3-3  | 2  | 5  | DGRFWAGKKFDP        | 12     | 2-14  | 2  | SSYTSSSVV    | 9      |  |
| mHD11 318 | 3-21  | 3-22 | 2  | 2  | RKTDYYDSSGYQIYWYFDL | 19     | 2-11  | 2  | CSYAGSYTSDVV | 12     |  |
| mHD11 326 | 3-48  | 4-23 | 2  | 4  | GLNDYGGNSPDY        | 12     | 2-14  | 2  | SSYTSSSTYVV  | 11     |  |
| mHD11 329 | 3-30  | 4-23 | 3  | 2  | VGLPLVTPRTNWWYFDL   | 17     | 2-11  | 2  | CSYAGSYVV    | 9      |  |
| mHD11 334 | 4-59  | 3-10 | 2  | 5  | GGSGGS              | 6      | 1-44  | 3  | AAWDDSLNALWV | 12     |  |

RF, reading frame

**Table S18.** Repertoire of antibodies from new emigrant B cells of healthy donor HD12.

| Ig        | HEAVY |      |    |    |                          |        | LIGHT |    |                |        |  |
|-----------|-------|------|----|----|--------------------------|--------|-------|----|----------------|--------|--|
|           | VH    | D    | RF | JH | CDR3 (aa)                | Length | Vκ    | Jκ | CDR3 (aa)      | Length |  |
| neHD12 17 | 3-7   | /    | /  | 4  | VGGAWLPEYFDY             | 12     | 3-15  | 1  | QQYNNWPPWT     | 10     |  |
| neHD12 23 | 3-7   | 3-9  | 2  | 6  | DKDIWDV                  | 7      | 1-33  | 2  | QQYDNLPTYT     | 9      |  |
| neHD12 33 | 3-33  | 3-10 | 3  | 6  | EAGVVRGVIIHFYYMDV        | 18     | 1-9   | 4  | QQLNSYPLT      | 9      |  |
| neHD12 44 | 3-23  | 3-22 | 2  | 4  | DEVYYDSSGYYYGKRGTFDY     | 21     | 3-15  | 1  | QQYNNWPPWT     | 10     |  |
| neHD12 45 | 3-23  | 2-2  | 2  | 6  | KTYCSSTSCYFVQEIGYGMDV    | 21     | 1-39  | 1  | QQSYSTPRA      | 9      |  |
| neHD12 47 | 4-39  | 7-27 | 2  | 3  | WGDAFDI                  | 7      | 1-6   | 1  | LQDYNYPRT      | 9      |  |
| neHD12 54 | 4-59  | 3-22 | 2  | 1  | GGKYYDSSGYPPrALQH        | 18     | 2-28  | 1  | MQALQTAT       | 8      |  |
| neHD12 58 | 1-8   | 6-6  | 2  | 4  | ALGYSSSSG                | 9      | 1-17  | 1  | LQHNSYPQT      | 9      |  |
| neHD12 59 | 3-23  | 3-9  | 1  | 6  | KVLRDWPDPSPAPYYYYGMDV    | 21     | 1-39  | 4  | QQSYSTPLT      | 9      |  |
| neHD12 60 | 3-23  | /    | /  | 4  | GVTRYFDY                 | 8      | 3-11  | 2  | QQRSNWYT       | 8      |  |
| neHD12 65 | 7-4-1 | /    | /  | 4  | DLRGPEGLDY               | 10     | 1-5   | 1  | QQYNSYWT       | 8      |  |
| neHD12 66 | 3-20  | 6-13 | 2  | 5  | DLYSSWSLNFDP             | 14     | 3-15  | 4  | QQYNNWSSA      | 9      |  |
| neHD12 67 | 1-24  | 2-15 | 3  | 3  | TLVVGIAKWELRNDAFDI       | 18     | 1-5   | 2  | QQYNSYSQYT     | 10     |  |
|           |       | 1-26 | 1  |    |                          |        |       |    |                |        |  |
| neHD12 69 | 4-59  | /    | /  | 6  | ESAGMDV                  | 7      | 3-11  | 2  | QQRSNWPPYT     | 10     |  |
| neHD12 70 | 3-9   | 3-22 | 2  | 3  | TSGNYDSSGYSTDAFDI        | 19     | 1-17  | 1  | LQHNSYPWT      | 9      |  |
| neHD12 72 | 3-66  | /    | /  | 6  | RTSYYYYGMDV              | 11     | 1-33  | 3  | QQYDNLGTT      | 9      |  |
| neHD12 79 | 4-59  | 6-19 | 2  | 4  | LVLLGSSGWYLDY            | 13     | 1-5   | 1  | QQSLT          | 5      |  |
| neHD12 87 | 3-15  | /    | /  | 4  | NEPAIDY                  | 7      | 2-28  | 4  | MQALQTPLT      | 9      |  |
| neHD12 90 | 4-59  | 3-16 | 2  | 4  | WGGDYVWGSYRYFDY          | 15     | 1-39  | 2  | QQSYSTLYT      | 9      |  |
| neHD12 93 | 1-46  | 3-3  | 3  | 5  | DGITFGVWNGPEFDP          | 16     | 1-39  | 2  | QQSYSTPPT      | 9      |  |
| neHD12 96 | 3-33  | 3-3  | 3  | 6  | VPDITIFGVVTTTKYYYGMDV    | 21     | 1-16  | 5  | QQYNSYP        | 7      |  |
| neHD12 68 |       |      |    |    |                          |        | 3-11  | 4  | QQRSNWPLT      | 10     |  |
| neHD12 83 |       |      |    |    |                          |        | 2-28  | 4  | MQALQTPLT      | 9      |  |
| neHD12 91 |       |      |    |    |                          |        | 1-39  | 1  | QQSYSTPS       | 8      |  |
|           | VH    | D    | RF | JH | CDR3 (aa)                | Length | Vλ    | Jλ | CDR3 (aa)      | Length |  |
| neHD12 19 | 3-72  | 5-12 | 2  | 6  | EPDSGYDPTYYYYYMDV        | 17     | 3-9   | 2  | QVWDSSTYVV     | 10     |  |
| neHD12 30 | 1-18  | 3-3  | 2  | 4  | SGWHDFWSGYPLLAYPTEAYYFDY | 25     | 6-57  | 2  | QSYDSSNVV      | 9      |  |
| neHD12 41 | 3-15  | 6-13 | 2  | 4  | AWGSSSWYEGGFDY           | 14     | 3-1   | 2  | QAWDSSTVV      | 9      |  |
| neHD12 42 | 4-59  | 3-22 | 2  | 5  | HGFDDLGPDYDSSGEAWWFDP    | 22     | 2-23  | 1  | CSYAGSSTYV     | 10     |  |
| neHD12 56 | 3-21  | 2-2  | 2  | 6  | DLGRYCSSTSCYTSGMDV       | 18     | 2-23  | 2  | CSYAGSSTYVV    | 11     |  |
| neHD12 80 | 4-4   | 4-17 | 2  | 2  | DRWDYGDYDYWYFDL          | 14     | 2-14  | 1  | SSYTSSSTLYV    | 11     |  |
| neHD12 81 | 4-39  | 3-9  | 2  | 5  | LLDYDPYWFDP              | 11     | 2-11  | 1  | CSYAGSYTWV     | 10     |  |
| neHD12 88 | 3-48  | 5-12 | 2  | 4  | EGYSGYGDY                | 9      | 1-40  | 2  | QSYDSSLQVV     | 10     |  |
| neHD12 89 | 1-8   | 3-10 | 2  | 4  | GISNSHVDYGSFSFY          | 16     | 9-49  | 2  | GADHGSGSNFGIVV | 14     |  |
| neHD12 20 |       |      |    |    |                          |        | 1-44  | 2  | AAWDDSLNGVV    | 11     |  |
|           | VH    | D    | RF | JH | CDR3 (aa)                | Length | V     | J  | CDR3 (aa)      | Length |  |
| neHD12 34 | 1-2   | 3-10 | 3  | 2  | GVSRWYDYWYFDL            | 12     |       |    |                |        |  |
| neHD12 94 | 4-59  | 6-19 | 3  | 5  | RIAVAGTSWFDP             | 12     |       |    |                |        |  |

RF, reading frame

**Table S19.** Repertoire of antibodies from mature naive B cells of healthy donor HD12.

| Ig       | HEAVY   |      |    |    |                             |        | LIGHT |    |              |        |
|----------|---------|------|----|----|-----------------------------|--------|-------|----|--------------|--------|
|          | VH      | D    | RF | JH | CDR3 (aa)                   | Length | Vκ    | Jκ | CDR3 (aa)    | Length |
| mHD12 05 | 4-61/59 | 6-6  | 2  | 4  | DLAAYSMSDY                  | 10     | 1-17  | 4  | LQHNSYPLT    | 9      |
| mHD12 07 | 4-34    | 4-17 | 3  | 4  | TLRGTIVTIVGGIYFDY           | 17     | 1-39  | 4  | QQSYSTPLT    | 9      |
| mHD12 09 | 3-23    | 6-6  | 3  | 5  | SIAARRGRGNWFDP              | 14     | 3-20  | 1  | QQYGSSWT     | 8      |
| mHD12 10 | 3-23    | 4-17 | 2  | 3  | DRPVGYGDYGPDAFDI            | 17     | 4-1   | 1  | QQYYSTPRT    | 9      |
| mHD12 12 | 5-51    | 6-19 | 2  | 6  | RGSGWYDEIYYYYGMDV           | 17     | 2-28  | 1  | MQALQTPQT    | 9      |
| mHD12 16 | 1-18    | 3-10 | 3  | 4  | ASPITMVRGASDPPGGY           | 17     | 1-27  | 1  | QKYNAPTWT    | 10     |
| mHD12 17 | 3-30    | 2-21 | 2  | 4  | CGGKYYFDY                   | 10     | 1-8   | 4  | QQYYSYPLT    | 10     |
| mHD12 22 | 3-23    | 3-22 | 2  | 4  | SREYYDSSGFGCFDY             | 16     | 3-11  | 3  | QQRSNWLFY    | 9      |
| mHD12 26 | 3-73    | /    | /  | 4  | HQGADY                      | 6      | 4-1   | 4  | QQYYSTPLT    | 9      |
| mHD12 27 | 3-33    | 6-19 | 1  | 4  | DLAEQWLVSVDY                | 13     | 1-5   | 2  | QQYNSYPYT    | 9      |
| mHD12 34 | 3-23    | /    | /  | 6  | DYEPGGYYYYYGMDV             | 17     | 1-39  | 2  | QQSYSTPYT    | 9      |
| mHD12 38 | 3-74    | 3-3  | 2  | 4  | DRDYDFWSGYPSGY              | 15     | 1-5   | 2  | QQYNSYPYT    | 9      |
| mHD12 39 | 5-51    | 4-17 | 2  | 4  | RGDYGDERDYFDY               | 13     | 3-20  | 2  | QQYGSSPDT    | 10     |
| mHD12 40 | 3-30    | 6-19 | 3  | 6  | PIAVAGTVLPDV                | 12     | 1-6   | 2  | LQDYNPLT     | 9      |
| mHD12 41 | 4-61/59 | 4-23 | 3  | 4  | TTVTPDYFDY                  | 11     | 1-39  | 3  | QQSYSTPFT    | 9      |
| mHD12 42 | 3-73    | /    | /  | 4  | LGVSTPDY                    | 9      | 3-11  | 4  | QQRSNWPPLT   | 10     |
| mHD12 50 | 3-48    | 5-5  | 3  | 4  | ELRKTAMAFDY                 | 11     | 1D-8  | 2  | QQYYSFPRT    | 9      |
| mHD12 51 | 3-48    | 5-12 | 2  | 4  | VPSVGSYGFYFDY               | 12     | 4-1   | 4  | QQYYSTPST    | 9      |
| mHD12 54 | 4-34    | 3-16 | 2  | 4  | GINDYVWGSYRYSGGSDY          | 19     | 3-20  | 3  | QQYGSSPRT    | 9      |
| mHD12 55 | 4-59    | 4-4  | 2  | 4  | LDYSNSYFDY                  | 10     | 3-15  | 4  | QQYNWPQLT    | 10     |
| mHD12 08 |         |      |    |    |                             |        | 1-16  | 4  | QQYNSYPLT    | 9      |
|          | VH      | D    | RF | JH | CDR3 (aa)                   | Length | Vλ    | Jλ | CDR3 (aa)    | Length |
| mHD12 13 | 1-18    | 3-9  | 2  | 4  | VLKAYDILTGYFFQGPRGGFDY      | 23     | 2-14  | 2  | SSYTSSSPVV   | 10     |
| mHD12 18 | 3-11    | /    | /  | 3  | VHQKNRQAWGAFDI              | 15     | 3-21  | 3  | QVWDSDDHQV   | 11     |
| mHD12 20 | 4-34    | 3-16 | 1  | 4  | GIRAYVWGSFSY                | 12     | 1-51  | 2  | GTWDSLSAGV   | 11     |
| mHD12 24 | 3-23    | /    | /  | 5  | GEDTWDFP                    | 8      | 2-14  | 3  | SSYTSSSTLV   | 10     |
| mHD12 28 | 4-59    | 5-24 | 2  | 4  | RDGYNTHRY                   | 9      | 3-21  | 2  | QVWDSDDHLVV  | 12     |
| mHD12 33 | 3-11    | 3-22 | 2  | 3  | DIFGTDYDSSGYLAFDI           | 19     | 2-14  | 1  | SSYTSSSTLYV  | 11     |
| mHD12 36 | 3-49    | 3-3  | 3  | 6  | GDPKQRQATSIQVVFPRPEDPTLGMDV | 28     | 1-40  | 2  | QSYDSSLGGDVV | 13     |
| mHD12 46 | 3-30    | 1-26 | 3  | 3  | AGAQTWGAFDI                 | 12     | 1-44  | 3  | AAWDDSLNGWV  | 11     |
| mHD12 49 | 4-39    | 3-3  | 3  | 2  | PIFVGVGANYWYFDL             | 15     | 2-14  | 1  | SSYTSSSPYV   | 10     |
| mHD12 56 | 3-23    | 3-22 | 3  | 4  | DNRITTHAEFDY                | 12     | 3-1   | 2  | QAWDSSTVV    | 9      |
| mHD12 70 | 1-18    | 3-10 | 3  | 6  | DPKPVTMVRGVILAYYYYYMDV      | 22     | 2-14  | 2  | SSYTSSSTSVV  | 11     |
| mHD12 74 | 4-34    | /    | /  | 3  | LTDAFDI                     | 7      | 2-8   | 1  | SSYAGSNNAYV  | 11     |
| mHD12 14 |         |      |    |    |                             |        | 3-1   | 2  | QAWDSSTAYVV  | 11     |
| mHD12 15 |         |      |    |    |                             |        | 3-21  | 2  | QVWDSDDHPI   | 11     |
| mHD12 65 |         |      |    |    |                             |        | 3-21  | 2  | QVWDSDDHPHVV | 13     |
|          | VH      | D    | RF | JH | CDR3 (aa)                   | Length | V     | J  | CDR3 (aa)    | Length |
| mHD12 04 | 3-33    | 5-5  | 1  | 4  | EVPGAQLWEGSYFDY             | 15     |       |    |              |        |
| mHD12 19 | 3-23    | 2-21 | 3  | 1  | LVGWSVTAHPPGYFQH            | 16     |       |    |              |        |
| mHD12 21 | 3-23    | 2-21 | 3  | 4  | VAVVTAIRGFAXDY              | 15     |       |    |              |        |
| mHD12 25 | 3-11    | 3-3  | 3  | 4  | EAGVVIQPFYD                 | 11     |       |    |              |        |
| mHD12 44 | 3-30    | 2-15 | 2  | 4  | EPKSHYCSGGSCHRGFFDY         | 19     |       |    |              |        |
| mHD12 45 | 3-33    | 1-1  | 3  | 6  | VGTTDSYYYYYMDV              | 15     |       |    |              |        |
| mHD12 52 | 5-51    | 3-22 |    | 4  |                             |        |       |    |              |        |
| mHD12 53 | 3-13    | 3-3  | 3  | 6  | ANITIFGVSSAPYYYYGMDV        | 20     |       |    |              |        |

RF, reading frame



**Table S20.** Repertoire of antibodies from new emigrant B cells of healthy donor HD13.

| Ig        | HEAVY  |      |    |    |                           |        | LIGHT |    |             |        |  |
|-----------|--------|------|----|----|---------------------------|--------|-------|----|-------------|--------|--|
|           | VH     | D    | RF | JH | CDR3 (aa)                 | Length | Vκ    | Jκ | CDR3 (aa)   | Length |  |
| neHD13 01 | 3-35   | 2-2  |    | 1  |                           |        | 3-20  | 2  | QQYGRS      | 6      |  |
| neHD13 02 | 3-15   | 3-3  | 2  | 6  | GLVRYDFWSSGGLPYYYYYMDV    | 22     | 1-39  | 1  | QSYSTLWT    | 9      |  |
| neHD13 05 | 3-11   | 5-5  | 1  | 6  | GPRIQLWYYGMDV             | 13     | 2-28  | 1  | MQALQTPPW   | 10     |  |
| neHD13 06 | 3-7    | /    | /  | 6  | LGQTYAGDYYYYYGMDV         | 17     | 2-28  | 4  | MQALQTRLT   | 9      |  |
| neHD13 22 | 4-61   | 6-13 | 2  | 6  | VISSSWYDYYYYYMDV          | 16     | 2-28  | 2  | MQALQTPS    | 8      |  |
| neHD13 23 | 4-59   | 6-19 | 3  | 4  | AVAGTVYFDY                | 10     | 3-20  | 2  | QQYGSSPS    | 8      |  |
| neHD13 27 | 4-59   | 1-26 | 2  | 4  | GSYFDY                    | 7      | 3-20  | 4  | QQYGSSLT    | 8      |  |
| neHD13 30 | 3-49   | 6-13 | 3  | 6  | GEALAAAGYYGMDV            | 14     | 2-28  | 2  | MQALQTPRYT  | 10     |  |
| neHD13 35 | 3-30-3 | 3-16 | 3  | 3  | EGGGGSASLGDAFDI           | 15     | 1-39  | 4  | QSYSTPLT    | 9      |  |
| neHD13 38 | 3-30   | 3-3  | 3  | 6  | ASLGIFGVNYYYYGMDV         | 18     | 2-28  | 4  | MQALQSLT    | 8      |  |
| neHD13 45 | 3-23   | 3-16 | 1  | 4  | SGLWGLPIDY                | 10     | 3-20  | 1  | QQYGSSPPWT  | 10     |  |
| neHD13 47 | 3-30-3 | 3-22 | 2  | 6  | HYDSSGHKGSYYYGMDV         | 18     | 1-39  | 5  | QSYSTPIT    | 9      |  |
|           | VH     | D    | RF | JH | CDR3 (aa)                 | Length | Vλ    | Jλ | CDR3 (aa)   | Length |  |
| neHD13 03 | 4-4    | 2-15 | 2  | 6  | DLGYCSGGSCPDIYYYYGMDV     | 20     | 2-14  | 3  | SSYSSSRRV   | 10     |  |
| neHD13 07 | 3-15   | 1-26 | 3  | 4  | EFGIVGVTPRGAAY            | 14     | 3-25  | 3  | QSADSSGTLWV | 11     |  |
| neHD13 10 | 4-39   | 2-21 | 2  | 4  | YCGGDYSLYFDY              | 13     | 2-14  | 2  | SSYSSSTLVV  | 11     |  |
| neHD13 12 | 4-59   | 3-22 | 2  | 4  | LPVCSSGYCYFDY             | 14     | 3-21  | 1  | QVWDSSSDHYV | 11     |  |
| neHD13 15 | 1-3    | 3-10 | 2  | 6  | EESYYGATYYYYGMDV          | 16     | 1-47  | 3  | AAWDDSLSGWV | 11     |  |
| neHD13 19 | 4-39   | 2-2  | 3  | 4  | SPFWVPAADYFDY             | 14     | 2-14  | 2  | SSYSSSTVV   | 10     |  |
| neHD13 20 | 4-61   | 2-2  | 2  | 2  | VGVDCSSTSCYTPNWFYDL       | 19     | 1-40  | 2  | QSYDSSLSGST | 11     |  |
| neHD13 28 | 3-23   | 3-22 | 3  | 4  | GSSPMIVVPSGPFYD           | 15     | 3-21  | 2  | QVWDSSSDRVV | 11     |  |
| neHD13 34 | 4-b    | 2-15 | 3  | 5  | IGVVAAGFCFDP              | 12     | 1-51  | 3  | GTWDSSLSAGV | 11     |  |
| neHD13 36 | 4-4    | 3-3  | 2  | 3  | DEDFWKAFDI                | 10     | 1-51  | 2  | GTWDSSLSAGV | 11     |  |
| neHD13 40 | 4-b    | /    | /  | 4  | GIPVREGYFDY               | 12     | 1-47  | 2  | AAWDDSLSGVV | 11     |  |
| neHD13 48 | 4-4    | 3-10 | 2  | 4  | SSYYGSGSYFDY              | 12     | 3-1   | 2  | QAWDSSTAVV  | 10     |  |
|           | VH     | D    | RF | JH | CDR3 (aa)                 | Length | V     | J  | CDR3 (aa)   | Length |  |
| neHD13 08 | 3-21   | /    | /  | 5  |                           |        |       |    |             |        |  |
| neHD13 13 | 3-49   | 4-17 | 2  | 2  | SSGYGDYATYWFYDL           | 15     |       |    |             |        |  |
| neHD13 14 | 1-24   | 1-26 | 3  | 5  | DLIVGAPHA                 | 9      |       |    |             |        |  |
| neHD13 26 | 3-30   | 6-19 | 2  | 5  | GPYSSGWYRGWFDP            | 14     |       |    |             |        |  |
| neHD13 33 | 4-4    | 2-2  | 2  | 6  | VKETAGYCSSTSCYSPSHYYYYMDV | 25     |       |    |             |        |  |
| neHD13 44 | 3-30   | /    | /  | 5  | GGVRFTKQNPLDWFDP          | 16     |       |    |             |        |  |

RF, reading frame

**Table S21.** Repertoire of antibodies from mature naïve B cells of healthy donor HD13.

| Ig       | HEAVY  |      |    |    |                         |        | LIGHT |    |              |        |
|----------|--------|------|----|----|-------------------------|--------|-------|----|--------------|--------|
|          | VH     | D    | RF | JH | CDR3 (aa)               | Length | Vκ    | Jκ | CDR3 (aa)    | Length |
| mHD13 01 | 3-23   | /    | /  | 4  | GGHFDY                  | 6      | 1-8   | 1  | QQYYSYPRT    | 9      |
| mHD13 03 | 3-11   | 3-10 | 3  | 4  | DFSWGVVVDY              | 9      | 3-11  | 1  | QQRSNWLWT    | 9      |
| mHD13 07 | 3-7    | 3-3  | 2  | 6  | DASRYDYDFWSGYPIYYYYGMDV | 23     | 2-28  | 1  | MQALQTRT     | 8      |
| mHD13 11 | 4-30-4 | 3-10 | 3  | 5  | TQPTMVRGVIFEQGGGFDP     | 19     | 1-9   | 1  | QQLNSYPRT    | 9      |
| mHD13 15 | 3-11   | 1-26 | 2  | 4  | EGFYSGSYSDY             | 11     | 1-39  | 3  | QQSYSTPFT    | 9      |
| mHD13 22 | 3-23   | 4-17 | 3  | 4  | APSPTTVNGFDY            | 12     | 3-15  | 1  | QQYNNWPLT    | 9      |
| mHD13 23 | 4-4    | 4-17 | 3  | 6  | DPDRGTVTDGMDV           | 13     | 2-30  | 2  | MQGTHWLYT    | 9      |
| mHD13 27 | 4-30-4 | 2-21 | 1  | 3  | VNLLWWNAFDI             | 11     | 1-39  | 2  | QQSYSILYT    | 9      |
| mHD13 31 | 3-9    | /    | /  | 3  | GTWRAYAYAFDAFDI         | 15     | 1-5   | 3  | QQYNGIFT     | 8      |
| mHD13 34 | 3-30-3 | 3-22 | 2  | 4  | TPDYDSSGYAN             | 13     | 4-1   | 4  | QQYYSTPPT    | 9      |
| mHD13 35 | 4b     | /    | /  | 1  | DSGGR                   | 5      | 1-33  | 4  | QQYDNLPPFT   | 10     |
| mHD13 36 | 1-2    | 3-10 | 2  | 6  | DEGSGYPPYYYYMDV         | 16     | 3-20  | 4  | QQYGSSPRLT   | 11     |
| mHD13 37 | 3-9    | 1-26 | 3  | 4  | DAIVGAFGLPDY            | 12     | 1-5   | 1  | QQYNSYSPWT   | 10     |
| mHD13 40 | 3-30-3 | 6-13 | 3  | 3  | DVLGAAAPHAFDI           | 13     | 3-20  | 2  | QQYGSSPYT    | 9      |
| mHD13 44 | 4-30-4 | /    | /  | 3  | DLSRSGGGGSAFDI          | 14     | 1-33  | 1  | QQYDNLPT     | 8      |
| mHD13 47 | 1-24   | /    | /  | 4  | SGILRGPFDY              | 10     | 3-20  | 4  | QQYGSSPPLT   | 10     |
| mHD13 09 |        |      |    |    |                         |        | 1-39  | 1  | QQSYSTPPST   | 10     |
|          | VH     | D    | RF | JH | CDR3 (aa)               | Length | Vλ    | Jλ | CDR3 (aa)    | Length |
| mHD13 05 | 4b     | 5-24 | 2  | 4  | RLGRDGYNFPPDY           | 13     | 2-23  | 1  | CSYAGSSTDNYV | 12     |
| mHD13 10 | 1-18   | 2-2  | 3  | 6  | ALQDIVVPAAPYMDV         | 16     | 2-14  | 3  | SSYTSSTLWV   | 11     |
| mHD13 13 | 3-30   | /    | /  | 3  | EQPRLGDDAFDI            | 12     | 3-25  | 2  | QSADSSGTYRVV | 12     |
| mHD13 16 | 1-24   | 3-22 | 2  | 5  | AVDSSGYYYLTPPGASRWFDP   | 21     | 3-21  | 1  | QVWDSSSDHQV  | 11     |
| mHD13 26 | 3-30   | 3-3  | 3  | 6  | DPMYYLVFGVALPDYYYYMDV   | 21     | 1-51  | 2  | GTWDSSLSAVV  | 11     |
| mHD13 40 |        |      |    |    | see kappa               |        | 2-23  | 2  | CSYAGSSTFVV  | 11     |
| mHD13 41 | 3-11   | 2-2  | 3  | 4  | DSRSDLIVVPAAADY         | 16     | 3-21  | 2  | QVWDSSSDHVV  | 11     |
| mHD13 48 | 4-39   | 5-5  | 2  | 6  | SIHSYSLDLVDYYGMDV       | 17     | 3-1   | 2  | QAWDSSTVV    | 9      |
| mHD13 33 |        |      |    |    |                         |        | 3-1   | 2  | QAWDSSTVV    | 9      |

RF, reading frame

**Table S22.** Repertoire of antibodies from new emigrant B cells of healthy donor HD14.

| Ig        | HEAVY |      |    |    |                          |        | LIGHT |    |             |        |  |
|-----------|-------|------|----|----|--------------------------|--------|-------|----|-------------|--------|--|
|           | VH    | D    | RF | JH | CDR3 (aa)                | Length | Vκ    | Jκ | CDR3 (aa)   | Length |  |
| neHD14 04 | 4-31  | 2-2  | 2  | 5  | GYCSSTSCNQGGNWFDP        | 17     | 4-1   | 4  | QQYYSTPLT   | 9      |  |
| neHD14 05 | 3-23  | 4-23 | 2  | 4  | EGDYGGNSLFGGEDY          | 15     | 3-11  | 4  | QQRSNWLT    | 8      |  |
| neHD14 06 | 4-4   | 4-4  | 3  | 5  | DIVMSQDMTTVTTVWFDP       | 18     | 3-15  | 1  | QQYNNWPQT   | 9      |  |
| neHD14 09 | 3-23  | 6-19 | 1  | 6  | DRQWLVSSEPSARPPWEDWDGMDV | 23     | 2-30  | 2  | MQGTHWPQRT  | 10     |  |
| neHD14 12 | 3-7   | 3-22 | 2  | 3  | HEAIGYYDSSGYYDAFDI       | 19     | 4-1   | 4  | QQYYSTPLT   | 9      |  |
| neHD14 14 | 4-4   | /    | /  | 2  | DDEYWYFDL                | 9      | 3-20  | 2  | QQYGSSLMYT  | 10     |  |
| neHD14 15 | 1-18  | 5-24 | 3  | 6  | EGMATQTADYYYYYGMDV       | 18     | 3-20  | 4  | QQYGSSPLT   | 9      |  |
| neHD14 16 | 3-7   | 3-22 | 2  | 4  | YSYYDSRCNFDY             | 13     | 1-33  | 4  | QQYDNLPLT   | 10     |  |
| neHD14 17 | 3-15  | 3-10 | 3  | 4  | DPLITMVRGVIIH            | 12     | 1D-13 | 3  | QQFNYYPLT   | 9      |  |
| neHD14 18 | 3-48  | 3-3  | 2  | 4  | DSDFWSGWFDY              | 11     | 3-15  | 4  | QQYNNWPPLT  | 10     |  |
| neHD14 21 | 4-39  | 4-17 | 2  | 3  | LIDVWRYGDYDHDAFDI        | 17     | 3-11  | 4  | QQRSNWPLT   | 9      |  |
| neHD14 22 | 3-23  | 6-6  | 2  | 3  | EYSSSSYGDFAFDI           | 14     | 1-39  | 5  | QSYSTPLT    | 9      |  |
| neHD14 24 | 4-59  | 2-2  | 2  | 4  | LHCSSTSCYEMYDY           | 15     | 1-39  | 3  | QSYSTPFT    | 9      |  |
| neHD14 25 | 1-69  | 6-13 | 3  | 5  | DPPEAAAGTEVRDFNPGWFDP    | 21     | 1-27  | 5  | QKYNAPET    | 9      |  |
| neHD14 27 | 3-15  | 6-6  | 3  | 4  | GIAARPGY                 | 8      | 1-39  | 2  | QSYSTPMYT   | 10     |  |
| neHD14 28 | 3-66  | 4-23 | 2  | 4  | DRRYGGNSVGFDFY           | 14     | 1-39  | 2  | QSYSTPYT    | 9      |  |
| neHD14 30 | 3-7   | 3-22 | 2  | 4  | DLTYYYDSSGPNPYFDY        | 18     | 3-11  | 4  | QQRSNWPLT   | 9      |  |
| neHD14 32 | 3-48  | 5-12 | 3  | 6  | DTHIVATYYYYGMDV          | 14     | 1-33  | 3  | QQYDNLPT    | 9      |  |
| neHD14 36 | 3-74  | 3-3  | 2  | 6  | NYDFWSGYYYYYGMDV         | 16     | 3-20  | 2  | QQYGSSPPYT  | 10     |  |
| neHD14 37 | 3-9   | 5-5  | 1  | 4  | GAQGIQLWFFNY             | 12     | 1-5   | 2  | QQYNSYSRYT  | 10     |  |
| neHD14 41 | 4-34  | /    | /  | 5  | GPGSPRLNWFDP             | 12     | 3-11  | 2  | QQRSNWPPRYT | 11     |  |
|           | VH    | D    | RF | JH | CDR3 (aa)                | Length | Vλ    | Jλ | CDR3 (aa)   | Length |  |
| neHD14 03 | 1-2   | 3-22 | 2  | 4  | VMGPINYDSSGYLNY          | 15     | 2-23  | 2  | CSYAGSSVV   | 9      |  |
| neHD14 07 | 1-2   | 2-8  | 2  | 4  | LGRADCTNGVCYDY           | 14     | 2-14  | 2  | SSYSSSTVV   | 10     |  |
| neHD14 10 | 3-11  | 5-5  | 2  | 6  | DKGGYSYGSAYYYGMDV        | 17     | 1-51  | 2  | GTWDSSLSAGV | 11     |  |
| neHD14 14 |       |      |    |    | see kappa                |        | 2-8   | 1  | SSYAGSNKLGV | 11     |  |
| neHD14 23 | 1-2   | 6-13 | 1  | 4  | DEQQLVVAGYYMGY           | 14     | 3-25  | 2  | QSADSSGTYVV | 11     |  |
| neHD14 26 | 3-23  | 1-26 | 1  | 3  | GPEWELPRHAFDI            | 13     | 3-21  | 7  | QVWDSSSDHAV | 11     |  |
|           | VH    | D    | RF | JH | CDR3 (aa)                | Length | V     | J  | CDR3 (aa)   | Length |  |
| neHD14 33 | 3-9   | 3-3  | 2  | 6  | DKGFWSGYARVAYYYGMDV      | 20     |       |    |             |        |  |
| neHD14 38 | 3-23  | 2-15 | 3  | 4  | VADIVVVVAAPPY            | 14     |       |    |             |        |  |

RF, reading frame

**Table S23.** Repertoire of antibodies from mature naive B cells of healthy donor HD14.

| Ig       | HEAVY |      |    |    |                          |        | LIGHT |    |             |        |           |
|----------|-------|------|----|----|--------------------------|--------|-------|----|-------------|--------|-----------|
|          | VH    | D    | RF | JH | CDR3 (aa)                | Length | Vκ    | Jκ | CDR3 (aa)   | Length |           |
| mHD14 01 | 3-53  | 3-22 | 2  | 3  | YYYDSFDAFDI              | 11     | 1-39  | 2  | QQSYSTPMYT  | 10     |           |
| mHD14 07 | 3-66  | /    | /  | 4  | WGNEDGGNY                | 9      | 1-39  | 1  | QQSYSTLWT   | 9      |           |
| mHD14 21 | 1-46  | 5-5  | 1  | 6  | GGTWIQPFQMDV             | 12     | 2-28  | 2  | MQALQTPYT   | 9      |           |
| mHD14 26 | 3-7   | 6-6  | 1  | 4  | DWGLVKQLWGVDFDY          | 16     | 1-39  | 4  | QQSYSTPPRT  | 10     |           |
| mHD14 33 | 4-59  | 3-22 | 2  | 6  | GGPQYYYYDSSGYQYYYYYGMVDV | 22     | 1-33  | 1  | QQYDNLQPWT  | 10     |           |
| mHD14 41 | 1-69  | 3-22 | 2  | 6  | TYDSSGYYYYYYGMVDV        | 17     | 1-16  | 4  | QQYNSYPLT   | 9      |           |
| mHD14 44 | 1-18  | 2-21 | 3  | 4  | DVSMGVTAIPVDYDFDY        | 16     | 1-5   | 4  | QQYNSYPLT   | 9      |           |
| mHD14 47 | 3-23  | 6-19 | 3  | 6  | GEGAVAGYYYYYGMVDV        | 16     | 2-28  | 3  | MQALQTPIT   | 9      |           |
| mHD14 62 | 4-59  | 5-12 | 2  | 6  | DSGYDDPAAMDV             | 12     | 3D-15 | 2  | QQYNNWPPYT  | 10     |           |
| mHD14 67 | 3-9   | 6-6  | 3  | 6  | DRGIAAPYYYYGMVDV         | 14     | 3-20  | 5  | QQYGSSPIT   | 9      |           |
| mHD14 70 | 3-21  | 3-3  | 2  | 3  | ATVGYDFWVSGLDLAFDI       | 17     | 4-1   | 4  | QQYYSTPLT   | 9      |           |
| mHD14 76 | 5-51  | 3-10 | 2  | 4  | HGRIWGSNGY               | 10     | 3-11  | 4  | QQRSNWLT    | 8      |           |
| mHD14 77 | 4-31  | 3-22 | 2  | 4  | GGGSSSGSPV               | 10     | 2-30  | 3  | MQGTHWPPFT  | 10     |           |
| mHD14 81 | 4-39  | 4-4  | 3  | 4  | RTTVTRNGFDY              | 11     | 2-28  | 4  | MQALQTLT    | 9      |           |
| mHD14 08 |       |      |    |    |                          |        | 2-28  | 1  | MQALQTPRT   | 9      |           |
| mHD14 17 |       |      |    |    |                          |        | 1-39  | 1  | QQSYSTPVT   | 9      |           |
| mHD14 23 |       |      |    |    |                          |        | 2D-29 | 4  | MQSIQLPLT   | 9      |           |
| mHD14 25 |       |      |    |    |                          |        | 1-39  | 2  | QQSYSTPYT   | 9      |           |
| mHD14 61 |       |      |    |    |                          |        | 1-5   | 2  | QQYNSYMYT   | 10     |           |
| mHD14 63 |       |      |    |    |                          |        | 3-20  | 2  | QQYGSSPLT   | 9      |           |
| mHD14 78 |       |      |    |    |                          |        | 3-20  | 4  | QQYGSSPPLT  | 10     |           |
| mHD14 82 |       |      |    |    |                          |        | 1-NL1 | 3  | QQYYSTPFT   | 9      |           |
| mHD14 90 |       |      |    |    |                          |        | 1-9   | 2  | QQLNSYLYT   | 9      |           |
|          |       |      |    |    |                          |        | VH    | D  | RF          | JH     | CDR3 (aa) |
| mHD14 16 | 4-34  | 3-3  | 2  | 6  | SQYYDFWVSGYPERDYMDV      | 19     | 3-21  | 3  | QVWDSSSVKV  | 10     |           |
| mHD14 20 | 3-23  | 6-13 | 3  | 4  | MGAIAAGFDY               | 11     | 2-8   | 2  | SSYAGSNNWV  | 10     |           |
| mHD14 27 | 4-34  | 3-10 | 2  | 4  | AQGYGSGSYKALGFDY         | 19     | 3-21  | 3  | QVWDSSSDHWV | 11     |           |
| mHD14 29 | 1-8   | /    | /  | 6  | VAYDYYYYYYGMVDV          | 14     | 1-44  | 2  | AAWDDSLNGVV | 11     |           |
| mHD14 37 | 3-11  | 4-23 | 2  | 4  | GRYGGNSPMCY              | 11     | 6-57  | 3  | QSYDSSNHVV  | 10     |           |
| mHD14 38 | 3-66  | 2-2  | 2  | 6  | DLSTSFYGMVDV             | 11     | 1-40  | 2  | QSYDSSLSGVV | 11     |           |
| mHD14 39 | 3-64  | 6-19 | 1  | 4  | EQWLGGYDFDY              | 11     | 2-11  | 1  | CSYAGSYIHVV | 11     |           |
| mHD14 49 | 3-66  | 6-13 | 3  | 4  | MGLGIAAAGLDY             | 12     | 2-14  | 3  | SSYTSSSTWV  | 10     |           |
| mHD14 50 | 3-64  | 6-6  | 2  | 4  | VMGYSSSSGRDY             | 12     | 3-21  | 1  | QVWDSSSDHYV | 11     |           |
| mHD14 53 | 3-11  | 3-3  | 2  | 4  | VDHDFWVSGNIDY            | 12     | 1-51  | 3  | GTWDSSLSAGV | 11     |           |
| mHD14 55 | 4-34  | /    | /  | 4  | VPPGGQDY                 | 8      | 3-21  | 1  | QVWDSSSDHYV | 11     |           |
|          | VH    | D    | RF | JH | CDR3 (aa)                | Length | V     | J  | CDR3 (aa)   | Length |           |
| mHD14 47 | 3-23  | 6-19 | 3  | 6  | GEGAVAGYYYYYGMVDV        | 16     |       |    |             |        |           |
| mHD14 87 | 4-34  | 7-27 | 3  | 4  | GNPNWGFYY                | 9      |       |    |             |        |           |

RF, reading frame

**Table S24.** Repertoire and reactivity of antibodies from new emigrant B cells of healthy donor HD15.

| Ig          | HEAVY |      |    |    |                      | LIGHT  |      |    |             |        | REACTIVITY |       |          |
|-------------|-------|------|----|----|----------------------|--------|------|----|-------------|--------|------------|-------|----------|
|             | VH    | D    | RF | JH | CDR3 (aa)            | Length | Vκ   | Jκ | CDR3 (aa)   | Length | Poly       | HEp-2 | Staining |
| neHD15 02   | 1-18  | 6-19 | 3  | 4  | VESRAVAGLLRNDY       | 14     | 1-39 | 3  | QQSYSTPLFT  | 10     | -          | +     | -        |
| neHD15 09   | 3-33  | 6-19 | 3  | 4  | DPADYIAVAGTGY        | 13     | 1-33 | 4  | QQYDNLPR    | 9      | -          | -     | -        |
| neHD15 16 # | 4-39  | /    | /  | 4  | KQTIPQLPIDY          | 11     | 3-20 | 2  | QQYGSSPQT   | 9      |            |       |          |
| neHD15 17   | 3-23  | /    | /  | 4  | GIWDDFDY             | 8      | 2-30 | 3  | MQGTHWPPRFT | 11     | -          | +     | -        |
| neHD15 22   | 3-66  | 3-3  | 1  | 4  | DGGFLETSPFDY         | 12     | 1-5  | 1  | QQYNSYPWT   | 9      | -          | -     | -        |
| neHD15 26 # | 3-48  | /    | /  | 6  | DDWFAGTHKPSQNYYYGMDV | 21     | 3-15 | 1  | QQYNNWPLT   | 9      |            |       |          |
| neHD15 30   | 4-34  | 6-6  | 1  | 6  | RKQLGIYYYYGMDV       | 14     | 3-15 | 2  | QQYNNWPPMYT | 11     | +          | +     | F        |
| neHD15 33   | 4-59  | 3-10 | 2  | 3  | EGSYWDRDAFDI         | 12     | 3-20 | 3  | QQYGSSLPYT  | 10     | -          | +     | -        |
| neHD15 34   | 7-81  | 6-13 | 3  | 3  | ESIAAASKGRGAFDI      | 15     | 3-20 | 1  | QQYGSSPRT   | 9      | -          | -     | -        |
| neHD15 40   | 4-39  | 6-19 | 2  | 4  | GWGSGWYFDY           | 11     | 1-5  | 2  | QQYNSYPYT   | 9      | -          | -     | -        |
| neHD15 44 # | 3-43  | 6-19 | 3  | 4  | ALSPGIAVAGTEMGY      | 15     | 3-15 | 1  | QQYNNWPPRT  | 10     |            |       |          |
| neHD15 49   | 1-69  | 1-7  | 1  | 6  | DTLELEQPYYYGMDV      | 16     | 2-30 | 4  | MQGTHFLT    | 8      | -          | +     | -        |
| neHD15 50   | 4-34  | 1-26 | 3  | 5  | GKSLVGAIPWFDP        | 13     | 3-15 | 2  | QQYNNWPYT   | 9      | -          | +     | -        |
| neHD15 54   | 4-59  | 1-26 | 2  | 3  | DGGSHGVDAFDI         | 13     | 3-20 | 1  | QQYGSSPWT   | 9      | -          | +     | -        |
| neHD15 63   | 1-69  | /    | /  | 2  | AASVAKAYWYFDL        | 13     | 1-8  | 2  | QQYNSYPYT   | 9      | -          | -     | -        |
| neHD15 69 # | 1-2   | 4-17 | 3  | 4  | GVGTVTSFDY           | 10     | 1-5  | 1  | QQYNSYSRT   | 9      |            |       |          |
| neHD15 72   | 3-23  | 1-26 | 2  | 4  | PGTSGSYVGLSYFDY      | 16     | 1-27 | 1  | QKYNAPWT    | 9      | -          | -     | -        |
| neHD15 73   | 4-59  | /    | /  | 4  | HRVNTGEAGKFDY        | 13     | 3-15 | 3  | QQYNNWPR    | 8      | -          | -     | -        |
| neHD15 74   | 5-51  | 6-6  | 2  | 3  | LYSSSQGFDAFDI        | 14     | 1-8  | 1  | QQYNSYPQT   | 9      | -          | -     | -        |
| neHD15 76 # | 1-24  | /    | /  | 4  | VSRGIPTDY            | 9      | 3-15 | 4  | QQYNNWPGT   | 9      |            |       |          |
| neHD15 78   | 1-18  | 4-4  | 3  | 4  | AEGMTVTINDY          | 12     | 1-16 | 4  | QQYNSYPLT   | 9      | -          | +     | -        |
| neHD15 85 # | 3-11  | 3-22 | 2  | 4  | G GKRYDSSGYGY        | 14     | 3-20 | 1  | QQYGSSPET   | 9      |            |       |          |
| neHD15 89 # | 3-48  | /    | /  | 4  | DLPLDY               | 6      | 3-20 | 2  | QQYGSSLYT   | 9      |            |       |          |
| neHD15 92   | 4-39  | /    | /  | 3  | HRNLPTGAFDI          | 11     | 1-5  | 1  | QQYNSYSPT   | 9      | -          | -     | -        |
| neHD15 94 # | 3-48  | 4-17 | 3  | 3  | LMTVTVSWNAFDI        | 13     | 1-5  | 1  | QQYNSYSGT   | 9      |            |       |          |
| neHD15 20   |       |      |    |    |                      |        | 1-39 | 2  | QQSYSTPPMYT | 11     |            |       |          |
| neHD15 25   |       |      |    |    |                      |        | 4-1  | 3  | QQYSTPFT    | 9      |            |       |          |
| neHD15 57   |       |      |    |    |                      |        | 3-20 | 1  | QQYGSSWT    | 8      |            |       |          |
| neHD15 58   |       |      |    |    |                      |        | 3-20 | 2  | QQYGSSPGT   | 9      |            |       |          |
| neHD15 84   |       |      |    |    |                      |        | 1-39 | 4  | QQSYSTPPT   | 9      |            |       |          |
| neHD15 88   |       |      |    |    |                      |        | 3-20 | 4  | QQYGSSPLT   | 9      |            |       |          |
|             | VH    | D    | RF | JH | CDR3 (aa)            | Length | Vλ   | Jλ | CDR3 (aa)   | Length | Poly       | HEp-2 | Staining |
| neHD15 27 # | 1-69  | 6-13 | 2  | 6  | IEWKYSSTFYYYYYGMDV   | 18     | 2-8  | 2  | SSYAGSNNLV  | 10     |            |       |          |
| neHD15 91   | 3-30  | 3-10 | 2  | 4  | EWYSGSFDY            | 10     | 1-40 | 2  | QSYDSSLGSGV | 12     | -          | -     | -        |
| neHD15 96   | 3-53  | /    | /  | 5  | ARPRVDFP             | 8      | 2-14 | 2  | SSYSSSTFGV  | 11     | -          | -     | -        |
|             | VH    | D    | RF | JH | CDR3 (aa)            | Length | V    | J  | CDR3 (aa)   | Length | Poly       | HEp-2 | Staining |
| neHD15 08   | 4-31  | 3-16 | 2  | 4  | THYDYVWGSSYCFDY      | 16     |      |    |             |        |            |       |          |
| neHD15 37   | 3-15  | 3-10 | 1  | 4  | LWFGELRSDDDV         | 12     |      |    |             |        |            |       |          |
| neHD15 39   | 4-4   | 3-22 | 2  | 4  | SRGIDSSGYLGY         | 12     |      |    |             |        |            |       |          |
| neHD15 47   | 3-30  | 3-22 | 3  | 4  | DFATMIVVAPDY         | 12     |      |    |             |        |            |       |          |
| neHD15 48   | 4-34  | 6-19 | 2  | 4  | GVRSSGWSGSFSTYFDY    | 18     |      |    |             |        |            |       |          |
| neHD15 51   | 3-43  | 4-23 | 2  | 2  | EHGGNLDWYFDL         | 12     |      |    |             |        |            |       |          |
| neHD15 59   | 3-43  | 4-17 | 2  | 3  | AQSQDYGDYGPDAFDI     | 16     |      |    |             |        |            |       |          |
| neHD15 79   | 4-31  | 5-12 | 2  | 4  | LLPYSGYDDGHYFDY      | 16     |      |    |             |        |            |       |          |
| neHD15 80   | 7-81  | 6-13 | 2  | 3  | RLKSCGSSCLLMLFDI     | 17     |      |    |             |        |            |       |          |
| neHD15 81   | 4-39  | /    | /  | 4  | LSGPVPDY             | 8      |      |    |             |        |            |       |          |
| neHD15 82   | 4-39  | 1-26 | 3  | 4  | HAVGADADY            | 9      |      |    |             |        |            |       |          |
| neHD15 87   | 3-21  | /    | /  | 4  | EEGWVGPSPYFDY        | 14     |      |    |             |        |            |       |          |
| neHD15 90   | 4-34  | 6-6  | 2  | 6  | GNYSSTPDYGMV         | 15     |      |    |             |        |            |       |          |

RF, reading frame; #, antibody failed to be expressed

-, non-reactive; +, reactive; +2, highly reactive

c, diffuse cytoplasmic staining; A, actin staining; G, Golgi staining; M, mitochondria staining; MS, mitotic spindle staining; N, nuclear staining; F, cytoplasmic fibers

**Table S25.** Repertoire and reactivity of antibodies from mature naive B cells of healthy donor HD15.

| Ig         | HEAVY |      |    |    |                     | LIGHT  |       |    |              | REACTIVITY |      |      |          |
|------------|-------|------|----|----|---------------------|--------|-------|----|--------------|------------|------|------|----------|
|            | VH    | D    | RF | JH | CDR3 (aa)           | Length | Vκ    | Jκ | CDR3 (aa)    | Length     | Poly | Hep2 | Staining |
| mHD15 07   | 3-64  | 2-15 | 2  | 4  | DGRTYCSEGGSCSNPYFDY | 18     | 2D-29 | 2  | MQSIQPPT     | 8          | -    | -    | -        |
| mHD15 11   | 1-69  | /    | /  | 6  | GTLNYYYYGMDV        | 12     | 1-6   | 1  | LQDYNYPWT    | 9          | +2   | +2   | c        |
| mHD15 15   | 5-51  | 6-13 | 3  | 4  | PGIAAAGSFDY         | 11     | 3-15  | 1  | QQYNNWPSWT   | 10         | -    | -    | -        |
| mHD15 23 # | 5-51  | 2-21 | 2  | 4  | QDGSWETCGGDCYSVGLDY | 19     | 1-39  | 4  | QQSYSTPLT    | 9          |      |      |          |
| mHD15 31   | 4-39  | 4-23 | 2  | 2  | RASPEYDYGVIWYFDL    | 16     | 1-39  | 1  | QQSYSTPRT    | 9          | -    | -    | -        |
| mHD15 32   | 3-73  | 4-17 | 2  | 4  | SGYGDYPLFDY         | 11     | 2-28  | 1  | MQUALQTPWT   | 9          | -    | -    | c, MS    |
| mHD15 33 # | 1-3   | 5-12 | 2  | 4  | VRFDGSGVGY          | 10     | 3-11  | 2  | QQRSNWPRYT   | 10         |      |      |          |
| mHD15 44   | 4-55  | 4-23 | 2  | 2  | PRRAYGGNSGYWYFDL    | 16     | 1-39  | 1  | QQSYSTPWT    | 9          | -    | -    | -        |
| mHD15 47   | 1-3   | 6-19 | 2  | 5  | PGYSSGLVQNWFDP      | 14     | 4-1   | 4  | QQYYSTPT     | 8          | -    | +2   | N        |
| mHD15 61   | 4-39  | 1-26 | 3  | 4  | QVGARECDY           | 9      | 1-33  | 4  | QQSVT        | 5          | -    | -    | -        |
| mHD15 63 # | 1-69  | 3-22 | 2  | 5  | EGSGLHYDP           | 9      | 3-11  | 1  | QQRSNWPAT    | 9          |      |      |          |
| mHD15 65   | 5-51  | /    | /  | 4  | HIYGSDY             | 7      | 2-28  | 2  | MQUALQTYT    | 9          | -    | -    | -        |
| mHD15 72   | 1-46  | 1-26 | 2  | 4  | TRARGSGSYFLLDY      | 15     | 4-1   | 4  | QQYYSTPPFLT  | 11         | -    | -    | -        |
| mHD15 75   | 1-69  | 2-2  | 3  | 6  | IVVVPARYGMDV        | 13     | 1-17  | 1  | LQHNSYPWT    | 9          | -    | +    | -        |
| mHD15 89 # | 1-18  | 4-17 | 2  | 5  | DQPYGDYVNVWFDP      | 14     | 4-1   | 4  | QQYYSTPT     | 8          |      |      |          |
| mHD15 92   | 3-23  | /    | /  | 4  | DRGVAGSTD           | 9      | 1-8   | 1  | QQYYSYPT     | 9          | -    | -    | -        |
| mHD15 94   | 4-59  | /    | /  | 4  | IAWDPSGFYFDY        | 13     | 1-5   | 4  | QQYNSYST     | 8          | -    | -    | -        |
| mHD15 96   | 1-69  | 4-4  | 2  | 4  | DEVIPDYGDYVLRQFDY   | 18     | 1D-12 | 5  | QQANSFPIT    | 9          | +    | +    | -        |
| mHD15 02   |       |      |    |    |                     |        | 1-39  | 4  | QQSYSTPPT    | 9          |      |      |          |
| mHD15 13   |       |      |    |    |                     |        | 3-15  | 1  | QQYNNWPRT    | 10         |      |      |          |
| mHD15 16   |       |      |    |    |                     |        | 3-20  | 1  | QQYGSSPRT    | 9          |      |      |          |
| mHD15 27   |       |      |    |    |                     |        | 1-39  | 1  | QQSYSTLWT    | 9          |      |      |          |
| mHD15 37   |       |      |    |    |                     |        | 3-15  | 3  | QQYNNWPFT    | 9          |      |      |          |
| mHD15 53   |       |      |    |    |                     |        | 1-5   | 2  | QQYNSMYT     | 9          |      |      |          |
| mHD15 54   |       |      |    |    |                     |        | 1-39  | 3  | QQSYSTFT     | 8          |      |      |          |
| mHD15 67   |       |      |    |    |                     |        | 3-15  | 1  | QQYNNWPRT    | 10         |      |      |          |
| mHD15 68   |       |      |    |    |                     |        | 1-33  | 1  | QQYDNLLWT    | 9          |      |      |          |
| mHD15 71   |       |      |    |    |                     |        | 1-27  | 4  | QKYNAPFT     | 9          |      |      |          |
| mHD15 85   |       |      |    |    |                     |        | 3-15  | 1  | QQYNNWPQT    | 9          |      |      |          |
| mHD15 90   |       |      |    |    |                     |        | 3-15  | 1  | QQYNNWPRT    | 10         |      |      |          |
|            | VH    | D    | RF | JH | CDR3 (aa)           | Length | Vλ    | Jλ | CDR3 (aa)    | Length     | Poly | Hep2 | Staining |
| mHD15 26   | 3-30  | 3-3  | 2  | 6  | GLYDFWSGYADYYYYGMDV | 21     | 1-44  | 2  | AAWDDSLNGLL  | 11         | -    | -    | -        |
| mHD15 36 # | 3-33  | 6-13 | 1  | 6  | DGQQLVLGHYYGMDV     | 16     | 3-1   | 1  | QAWDSSTAGV   | 10         |      |      |          |
| mHD15 61   |       |      |    |    | see kappa           |        | 3-1   | 2  | QAWDSSTAV    | 9          | -    | -    | -        |
| mHD15 62   | 4-34  | 6-6  | 2  | 4  | GRSSAPYFDY          | 12     | 2-23  | 2  | CSYAGSSTFGVV | 12         | -    | -    | -        |
| mHD15 74   | 3-33  | 6-13 | 2  | 6  | IEGSSWYVLGLDPYGGMDV | 20     | 3-25  | 2  | QADSSGYVYV   | 11         | -    | -    | -        |
| mHD15 82   | 4-31  | 3-22 | 2  | 4  | DAHYYDEGFDY         | 11     | 2-11  | 1  | CSYAGSYFRV   | 11         | -    | +    | -        |
| mHD15 95   | 3-21  | 3-22 | 2  | 3  | VYYDSSGYWGAFDI      | 15     | 1-40  | 2  | QSYDSSLGWVYV | 12         | -    | -    | -        |
|            | VH    | D    | RF | JH | CDR3 (aa)           | Length | V     | J  | CDR3 (aa)    | Length     | Poly | Hep2 | Staining |
| mHD15 38   | 5-51  | 2-15 | 2  | 4  | GLGYCSGGSCYSGQDY    | 16     |       |    |              |            |      |      |          |
| mHD15 52   | 4-59  | 3-3  | 2  | 2  | VETYAFWSGYPYWYFDL   | 17     |       |    |              |            |      |      |          |
| mHD15 59   | 3-48  | /    | /  | 4  | GYLFDY              | 6      |       |    |              |            |      |      |          |
| mHD15 77   | 3-64  | 6-19 | 1  | 4  | ANLGLVLPPTFDY       | 13     |       |    |              |            |      |      |          |
| mHD15 79   | 3-11  | 6-19 | 2  | 4  | VGYSWGYYEDY         | 11     |       |    |              |            |      |      |          |
| mHD15 87   | 3-11  | 5-24 | 3  | 4  | VRVEMATITGPSFDY     | 15     |       |    |              |            |      |      |          |
| mHD15 93   | 1-69  | 3-3  | 1  | 4  | RLRFLEWLGFYD        | 12     |       |    |              |            |      |      |          |

RF, reading frame; #, antibody failed to be expressed

-, non-reactive; +, reactive; +2, highly reactive

c, diffuse cytoplasmic staining; A, actin staining; G, Golgi staining; M, mitochondria staining; MS, mitotic spindle staining; N, nuclear staining; F, cytoplasmic fibers
